# Supplementary material for: Evolutionary Origin and Diversification of Epidermal Barrier Proteins in Amniotes
Source: PubMed Central journal article supplement (PMC4245816; doi:10.1093/molbev/msu251), 2014-08-27
Supplement: supp_msu251_Strasser-et-at-Supplements.pdf [file supp_msu251_Strasser-et-at-Supplements.pdf]

## **Supplementary Data**

# **Evolutionary origin and diversification of epidermal barrier proteins in amniotes**

Bettina Strasser, Veronika Mlitz, Marcela Hermann, Robert H Rice, Richard A  
Eigenheer, Lorenzo Alibardi, Erwin Tschachler, Leopold Eckhart

## **Content**

Supplementary Tables S1 – S6

Supplementary Figures S1 – S13

Suppl. Table S1

## Tentative abbreviations and full names of SEDC and EDKM genes in the green anole lizard and the chicken

| Species | Gene name abbreviation | Full gene name                                                                     |
|---------|------------------------|------------------------------------------------------------------------------------|
| Aca     | <i>EDCC1</i>           | Epidermal Differentiation protein containing Cysteine Cysteine motifs 1            |
| Aca     | <i>EDCC2</i>           | Epidermal Differentiation protein containing Cysteine Cysteine motifs 2            |
| Aca     | <i>EDCC3</i>           | Epidermal Differentiation protein containing Cysteine Cysteine motifs 3            |
| Aca     | <i>EDCM</i>            | Epidermal Differentiation protein containing a CCCC Motif                          |
| Aca     | <i>EDCP</i>            | Epidermal Differentiation protein rich in Cysteine and Proline                     |
| Aca     | <i>EDCPGS</i>          | Epidermal Differentiation protein rich in Cysteine, Proline, Glycine and Serine    |
| Aca     | <i>EDCQ1</i>           | Epidermal Differentiation protein rich in Cysteine and glutamine (Q) 1             |
| Aca     | <i>EDCQ2</i>           | Epidermal Differentiation protein rich in Cysteine and glutamine (Q) 2             |
| Aca     | <i>EDCQ3</i>           | Epidermal Differentiation protein rich in Cysteine and glutamine (Q) 3             |
| Aca     | <i>EDCRP</i>           | Epidermal Differentiation Cysteine-Rich Protein                                    |
| Aca     | <i>EDEPK</i>           | Epidermal Differentiation protein rich in glutamic acid (E), Proline and Lysine    |
| Aca     | <i>EDEPT</i>           | Epidermal Differentiation protein rich in glutamic acid (E), Proline and Threonine |
| Aca     | <i>EDKM</i>            | Epidermal Differentiation protein containing a KKLIQQ Motif                        |
| Aca     | <i>EDPCS</i>           | Epidermal Differentiation protein rich in Proline, Cysteine and Serine             |
| Aca     | <i>EDPKC</i>           | Epidermal Differentiation protein rich in Proline, lysine (K) and Cysteine         |
| Aca     | <i>EDPQ1</i>           | Epidermal Differentiation protein rich in Proline and glutamine (Q) 1              |
| Aca     | <i>EDPQ2</i>           | Epidermal Differentiation protein rich in Proline and glutamine (Q) 2              |
| Aca     | <i>EDPQ3</i>           | Epidermal Differentiation protein rich in Proline and glutamine (Q) 3              |
| Aca     | <i>EDPSQ</i>           | Epidermal Differentiation protein rich in Proline, Serine and glutamine (Q)        |
| Aca     | <i>EDSC</i>            | Epidermal Differentiation protein rich in Serine and Cysteine                      |
| Aca     | <i>EDSCP</i>           | Epidermal Differentiation protein rich in Serine, Cysteine and Proline             |
| Aca     | <i>EDSPR1</i>          | Epidermal Differentiation protein Small Proline Rich 1                             |
| Aca     | <i>EDSPR2</i>          | Epidermal Differentiation protein Small Proline Rich 2                             |
| Aca     | <i>EDSQ</i>            | Epidermal Differentiation protein rich in Serine and glutamine (Q)                 |
| Aca     | <i>EDWM</i>            | Epidermal Differentiation protein containing WYDP Motif                            |
| Aca     | <i>LOR1</i>            | Loricrin 1                                                                         |
| Aca     | <i>LOR2</i>            | Loricrin 2                                                                         |
| Gga     | <i>Edbeta</i>          | Epidermal Differentiation protein beta                                             |
| Gga     | <i>EDCH1</i>           | Epidermal Differentiation protein containing Cysteine Histidine motifs 1           |
| Gga     | <i>EDCH2</i>           | Epidermal Differentiation protein containing Cysteine Histidine motifs 2           |
| Gga     | <i>EDCH3</i>           | Epidermal Differentiation protein containing Cysteine Histidine motifs 3           |
| Gga     | <i>EDCH4</i>           | Epidermal Differentiation protein containing Cysteine Histidine motifs 4           |
| Gga     | <i>EDCH5</i>           | Epidermal Differentiation protein containing Cysteine Histidine motifs 5           |
| Gga     | <i>EDCRP</i>           | Epidermal Differentiation Cysteine-Rich Protein                                    |
| Gga     | <i>EDDM</i>            | Epidermal Differentiation protein containing DPCC Motifs                           |
| Gga     | <i>EDGH</i>            | Epidermal Differentiation protein rich in Glycine and Histidine                    |
| Gga     | <i>EDKM</i>            | Epidermal Differentiation protein containing a KKLIQQ Motif                        |
| Gga     | <i>EDMPN1</i>          | Epidermal Differentiation protein containing a MPN sequence motif 1                |
| Gga     | <i>EDMPN2</i>          | Epidermal Differentiation protein containing a MPN sequence motif 2                |
| Gga     | <i>EDMTF1</i>          | Epidermal Differentiation protein starting with MTF motif 1                        |
| Gga     | <i>EDMTF2</i>          | Epidermal Differentiation protein starting with MTF motif 2                        |
| Gga     | <i>EDMTF3</i>          | Epidermal Differentiation protein starting with MTF motif 3                        |
| Gga     | <i>EDMTF4</i>          | Epidermal Differentiation protein starting with MTF motif 4                        |
| Gga     | <i>EDMTFH</i>          | Epidermal Differentiation protein starting with MTF motif and rich in Histidine    |
| Gga     | <i>EDNC</i>            | Epidermal Differentiation protein encoded by Neighbor of Cornulin                  |
| Gga     | <i>EDPE</i>            | Epidermal Differentiation protein rich in Proline and glutamic acid (E)            |
| Gga     | <i>EDQCM</i>           | Epidermal Differentiation protein containing QC Motifs                             |
| Gga     | <i>EDQM1</i>           | Epidermal Differentiation protein containing a glutamine (Q) Motif 1               |
| Gga     | <i>EDQM2</i>           | Epidermal Differentiation protein containing a glutamine (Q) Motif 2               |
| Gga     | <i>EDQM3</i>           | Epidermal Differentiation protein containing a glutamine (Q) Motif 3               |
| Gga     | <i>EDQrep</i>          | Epidermal Differentiation protein containing glutamine (Q) repeats                 |
| Gga     | <i>EDSC</i>            | Epidermal Differentiation protein rich in Serine and Cysteine                      |
| Gga     | <i>EDWM</i>            | Epidermal Differentiation protein containing WYDP Motif                            |
| Gga     | <i>EDYM1</i>           | Epidermal Differentiation protein containing Y Motif 1                             |
| Gga     | <i>EDYM2</i>           | Epidermal Differentiation protein containing Y Motif 2                             |
| Gga     | <i>LOR1</i>            | Loricrin 1                                                                         |
| Gga     | <i>LOR2</i>            | Loricrin 2                                                                         |
| Gga     | <i>LOR3</i>            | Loricrin 3                                                                         |

NOTE - Aca, *Anolis carolinensis*; Gga, *Gallus gallus*.

Suppl. Table S2A

## Chicken EDC genes comprising 2 exons (SEDC genes)

| Gene                                   | Gene predictions based on <i>Gallus gallus</i> genome sequence |                                          |                                    |            |              |                                    |                        | Experimental data and protein predictions for <i>Gallus gallus</i> Tetra SL |                                                   |                                         |                                                                                  |                                   |
|----------------------------------------|----------------------------------------------------------------|------------------------------------------|------------------------------------|------------|--------------|------------------------------------|------------------------|-----------------------------------------------------------------------------|---------------------------------------------------|-----------------------------------------|----------------------------------------------------------------------------------|-----------------------------------|
|                                        | Orientation of gene within EDC                                 | Accession number of genomic DNA sequence | Start of coding sequence in exon 1 | Exon 1 end | Exon 2 start | Start of coding sequence in exon 2 | End of coding sequence | Expression confirmed by RT-PCR                                              | Accession number of sequence submitted to GenBank | Source of sequence submitted to GenBank | Differences in encoded proteins (relative to prediction from reference sequence) | Length of coding sequence (nucl.) |
| <i>EDCH1</i>                           | +                                                              | NC_006112.2                              | n.a.                               | 743641     | 744053       | 744074                             | 744325                 | yes                                                                         | KC963990                                          | cDNA skin E18                           | 4 aa changed                                                                     | 252                               |
| <i>EDQM1</i>                           | -                                                              | NC_006112.2                              | n.a.                               | 750893     | 750596       | 750578                             | 750213                 | yes                                                                         | KC963994                                          | cDNA scale E18                          | 1 aa deleted, 4 aa inserted                                                      | 375                               |
| <i>EDQM2</i>                           | -                                                              | NC_006112.2                              | n.a.                               | 754362     | 753920       | 753902                             | 753585                 | yes                                                                         | KC963993                                          | cDNA skin E18                           | 5 aa deleted                                                                     | 351                               |
| <i>EDSC</i>                            | -                                                              | NC_006112.2                              | n.a.                               | 757613     | 757168       | 757131                             | 756799                 | yes                                                                         | KJ569100                                          | cDNA skin E18                           | 1 aa changed                                                                     | 333                               |
| <i>EDWM</i>                            | -                                                              | NC_006112.2                              | n.a.                               | 761981     | 761638       | 761617                             | 761139                 | yes                                                                         | KC963981                                          | cDNA scale adult                        | 41 aa inserted, 2 aa changed                                                     | 777                               |
| <i>EDCH5</i>                           | -                                                              | NC_006112.2                              | n.a.                               | 764747     | 764655       | 764616                             | 763999                 | yes                                                                         | KC963991                                          | cDNA skin E18                           | 7 aa deleted, 2 aa changed                                                       | 597                               |
| <i>EDMPN1</i>                          | -                                                              | NC_006112.2                              | n.a.                               | 767684     | 767250       | 767228                             | 767022                 | yes                                                                         | KC963998                                          | cDNA skin E18                           | 1 aa changed                                                                     | 207                               |
| <i>EDMPN2</i>                          | -                                                              | NC_006112.2                              | n.a.                               | 771404     | 771074       | 771049                             | 770798                 | yes                                                                         | KJ569097                                          | cDNA skin E19                           | no                                                                               | 252                               |
| <i>EDCRP</i>                           | -                                                              | NC_006112.2                              | n.a.                               | 775643     | 775187       | 775144                             | 774512                 | yes                                                                         | KC963999                                          | gDNA                                    | 88 aa inserted                                                                   | 1158                              |
| <i>EDCH2</i>                           | -                                                              | NC_006112.2                              | n.a.                               | 779952     | n.d.         | 779606                             | 779307                 | no                                                                          | n.a.                                              | n.a.                                    | no                                                                               | 300                               |
| <i>EDCH3</i>                           | -                                                              | NC_006112.2                              | n.a.                               | 782567     | 782113       | 782092                             | 781793                 | yes                                                                         | KC963988                                          | cDNA skin E18                           | 1 aa changed                                                                     | 300                               |
| <i>EDCH4</i>                           | -                                                              | NC_006112.2                              | n.a.                               | 785605     | 785072       | 785051                             | 784773                 | yes                                                                         | KC963989                                          | cDNA skin E18                           | no                                                                               | 279                               |
| <i>EDQM3</i>                           | -                                                              | NC_006112.2                              | n.a.                               | 790619     | 789547       | 789527                             | 789267                 | yes                                                                         | KC963992                                          | cDNA skin E18                           | 1 aa changed                                                                     | 261                               |
| <i>EDGH</i>                            | -                                                              | NC_006112.2                              | 795656                             | 795633     | 794871       | n.a.                               | 794248                 | yes                                                                         | KC963980                                          | cDNA skin E18                           | no                                                                               | 648                               |
| <i>LOR3</i>                            | -                                                              | NC_006112.2                              | n.a.                               | 799695     | 799491       | 799476                             | 797560                 | yes                                                                         | KC964001                                          | cDNA scale E18                          | 1 aa changed                                                                     | 1917                              |
| <i>LOR2</i>                            | -                                                              | NC_006112.2                              | n.a.                               | 804232     | 803794       | 803779                             | 802064                 | yes                                                                         | KC964002                                          | cDNA skin E18                           | no                                                                               | 1716                              |
| <i>LOR1</i>                            | -                                                              | NC_006112.2                              | n.a.                               | 808797     | 807935       | 807915                             | 806284                 | yes                                                                         | KC963995                                          | cDNA skin E18                           | no                                                                               | 1632                              |
| <i>EDYM1</i>                           | -                                                              | NC_006112.2                              | n.a.                               | 821633     | 820168       | 820147                             | 819704                 | yes                                                                         | KC963982                                          | cDNA scale adult                        | 1 aa changed                                                                     | 444                               |
| <i>Edbeta</i>                          | +                                                              | NC_006112.2                              | n.a.                               | 824814     | 825186       | 825202                             | 825525                 | yes                                                                         | KC964000                                          | cDNA feather E18                        | no                                                                               | 324                               |
| <i>EDMTFH</i>                          | -                                                              | NC_006112.2                              | n.a.                               | 830601     | 829926       | 829905                             | 829606                 | yes                                                                         | KC963987                                          | cDNA feather E18                        | no                                                                               | 300                               |
| <i>EDMTF4</i>                          | +                                                              | NC_006112.2                              | n.a.                               | 832239     | 832949       | 832970                             | 833272                 | yes                                                                         | KC963986                                          | cDNA feather E18                        | no                                                                               | 303                               |
| <i>EDMTF2</i>                          | -                                                              | NC_006112.2                              | n.a.                               | 842817     | 841587       | 841562                             | 841299                 | yes                                                                         | KC963984                                          | cDNA skin E18                           | 1 aa changed                                                                     | 264                               |
| <i>EDMTF1</i>                          | -                                                              | NC_006112.2                              | n.a.                               | 847275     | 846745       | 846720                             | 846457                 | yes                                                                         | KC963983                                          | cDNA scale adult                        | 4 aa changed                                                                     | 264                               |
| <i>EDMTF3</i>                          | +                                                              | NC_006112.2                              | n.a.                               | 849644     | 850869       | 850894                             | 851124                 | yes                                                                         | KC963985                                          | cDNA skin E18                           | 1 aa changed                                                                     | 231                               |
| <i>Beta-keratin</i><br>(cluster start) | -                                                              | NC_006112.2                              | n.a.                               | 854528     | 854431       | 854410                             | 854012                 | no                                                                          | n.a.                                              | n.a.                                    | n.a.                                                                             | 399                               |
| <i>Beta-keratin</i><br>(cluster end)   | -                                                              | NC_006112.2                              | n.a.                               | 1082450    | 1081297      | 1081224                            | 1080733                | no                                                                          | n.a.                                              | n.a.                                    | n.a.                                                                             | 492                               |
| <i>EDYM2</i>                           | -                                                              | NC_006112.2                              | n.a.                               | 1089008    | 1087509      | 1087488                            | 1086550                | yes                                                                         | KF494198                                          | cDNA skin adult                         | no                                                                               | 939                               |
| <i>EDQrep</i>                          | -                                                              | NC_006112.2                              | n.a.                               | 1094493    | 1093630      | 1093609                            | 1092137                | yes                                                                         | KC963997                                          | cDNA skin adult                         | 2 aa changed                                                                     | 1473                              |
| <i>EDPE</i>                            | +                                                              | NC_006112.2                              | n.a.                               | 1103327    | 1105053      | 1105074                            | 1106024                | yes                                                                         | KF297351                                          | cDNA skin E18                           | no                                                                               | 951                               |
| <i>EDQCM</i>                           | -                                                              | NC_006112.2                              | n.a.                               | 1114255    | 1113295      | 1113284                            | 1112622                | yes                                                                         | KF297350                                          | cDNA skin E18                           | no                                                                               | 663                               |
| <i>EDDM-a</i>                          | -                                                              | NC_006112.2                              | n.a.                               | 1121430    | 1120707      | 1120665                            | 1118692                | yes                                                                         | KF716132                                          | cDNA feather E18                        | 2 x 15 aa inserted, 15 aa deleted                                                | 2019                              |
| <i>EDDM-b</i>                          | -                                                              | NC_006112.2                              | n.a.                               | 1121430    | 1120687      | 1120665                            | 1118692                | yes                                                                         | KF716133                                          | cDNA feather E18                        | 2 x 15 aa inserted, 15 aa deleted                                                | 2019                              |
| <i>EDNC</i>                            | +                                                              | NC_006112.2                              | n.a.                               | n.d.       | 1124136      | 1124144                            | 1125064                | no                                                                          | n.a.                                              | n.a.                                    | n.a.                                                                             | 921                               |

NOTE - n.a., not applicable; n.d., not determined; aa, amino acids; EDDM-a and EDDM-b are splice variants of the same gene, EDDM. Only the beta-keratin genes at the borders of the beta-keratin gene cluster are included in this table.

Suppl. Table S2B

## Chicken EDC genes comprising 3 exons

| Gene           | Gene predictions based on <i>Gallus gallus</i> genome sequence |                                          |                                    |            |              |                                    |            |              | Experimental data and protein predictions for <i>Gallus gallus</i> Tetra SL |                                |                                                   |                                         |                                                                                  |                                   |
|----------------|----------------------------------------------------------------|------------------------------------------|------------------------------------|------------|--------------|------------------------------------|------------|--------------|-----------------------------------------------------------------------------|--------------------------------|---------------------------------------------------|-----------------------------------------|----------------------------------------------------------------------------------|-----------------------------------|
|                | Orientation of gene within EDC                                 | Accession number of genomic DNA sequence | Start of coding sequence in exon 1 | Exon 1 end | Exon 2 start | Start of coding sequence in exon 2 | Exon 2 end | Exon 3 start | End of coding sequence                                                      | Expression confirmed by RT-PCR | Accession number of sequence submitted to GenBank | Source of sequence submitted to GenBank | Differences in encoded proteins (relative to prediction from reference sequence) | Length of coding sequence (nucl.) |
| <i>S100A9</i>  | +                                                              | NC_006112.2                              | 739505                             | 739513     | 740065       | n.a.                               | 740223     | 740530       | 740721                                                                      | no                             | n.a.                                              | n.a.                                    | n.a.                                                                             | 360                               |
| <i>CRNN</i>    | +                                                              | NC_006112.2                              | n.a.                               | 1132656    | 1132855      | 1132880                            | 1133017    | 1133140      | 1134156                                                                     | yes                            | GQ149127                                          | cDNA tongue                             | n.a.                                                                             | 1155                              |
| <i>SCFN</i>    | +                                                              | NC_006112.2                              | n.a.                               | 1138074    | 1139237      | 1139259                            | 1139396    | 1139871      | 1151966                                                                     | yes                            | KC700629                                          | gDNA                                    | n.a.                                                                             | 9642                              |
| <i>S100A11</i> | +                                                              | NC_006112.2                              | 1153990                            | 1153992    | 1154986      | n.a.                               | 1155137    | 1155382      | 1155534                                                                     | no                             | n.a.                                              | n.a.                                    | n.a.                                                                             | 306                               |

NOTE - n.a., not applicable; aa, amino acid residues. Only the S100A genes flanking the region of EDKM, SEDC, and SFTPs are included in this table.

Suppl. Table S2C

## Chicken EDC genes comprising 4 exons

| Gene          | Gene predictions based on <i>Gallus gallus</i> genome sequence |                                          |            |              |                                    |            |              |                        |            |              | Experimental data and protein predictions for <i>Gallus gallus</i> Tetra SL |                                                   |                                         |                                                                                  |                                   |
|---------------|----------------------------------------------------------------|------------------------------------------|------------|--------------|------------------------------------|------------|--------------|------------------------|------------|--------------|-----------------------------------------------------------------------------|---------------------------------------------------|-----------------------------------------|----------------------------------------------------------------------------------|-----------------------------------|
|               | Orientation of gene within EDC                                 | Accession number of genomic DNA sequence | Exon 1 end | Exon 2 start | Start of coding sequence in exon 2 | Exon 2 end | Exon 3 start | End of coding sequence | Exon 3 end | Exon 4 start | Expression confirmed by RT-PCR                                              | Accession number of sequence submitted to GenBank | Source of sequence submitted to GenBank | Differences in encoded proteins (relative to prediction from reference sequence) | Length of coding sequence (nucl.) |
| <i>EDKM-a</i> | +                                                              | NC_006112.2                              | 747298     | 747837       | 747858                             | 747983     | 748202       | 748306                 | 748336     | 748685       | yes                                                                         | KJ569098                                          | cDNA skin E19                           | 1 aa changed                                                                     | 231                               |
| <i>EDKM-b</i> | +                                                              | NC_006112.2                              | 747441     | 747837       | 747858                             | 747983     | 748202       | 748306                 | 748336     | 748685       | yes                                                                         | KJ569099                                          | cDNA skin E19                           | 1 aa changed                                                                     | 231                               |

NOTE - EDKM-a and EDKM-b are splice variants of the same gene, EDKM.

Suppl. Table S2D

## Lizard EDC genes comprising 2 exons (SEDC genes)

| Gene                 | Gene predictions based on <i>Anolis carolinensis</i> genome sequence |                                          |            |              |                                    |                        | Experimental data and protein predictions for <i>Anolis carolinensis</i> |                                                   |                                         |                                                                                  |                                   |
|----------------------|----------------------------------------------------------------------|------------------------------------------|------------|--------------|------------------------------------|------------------------|--------------------------------------------------------------------------|---------------------------------------------------|-----------------------------------------|----------------------------------------------------------------------------------|-----------------------------------|
|                      | Orientation of gene within EDC                                       | Accession number of genomic DNA sequence | Exon 1 end | Exon 2 start | Start of coding sequence in exon 2 | End of coding sequence | Expression confirmed by RT-PCR                                           | Accession number of sequence submitted to GenBank | Source of sequence submitted to GenBank | Differences in encoded proteins (relative to prediction from reference sequence) | Length of coding sequence (nucl.) |
| <i>EDPQ3</i>         | -                                                                    | NW_003339570.1                           | 84534      | 83145        | 83124                              | 82639                  | yes                                                                      | KF193418                                          | cDNA dewlap                             | no                                                                               | 486                               |
| <i>EDPQ2</i>         | +                                                                    | NW_003339570.1                           | 90356      | 92534        | 92552                              | 93007                  | yes                                                                      | KF193419                                          | cDNA dewlap                             | no                                                                               | 456                               |
| <i>EDSC</i>          | -                                                                    | NW_003338916.1                           | 1056792    | 1058646      | 1058668                            | 1059000                | yes                                                                      | KC963972                                          | cDNA skin grow.                         | 1 aa deleted                                                                     | 330                               |
| <i>EDWM</i>          | -                                                                    | NW_003338916.1                           | 1022355    | 1023658      | 1023669                            | 1024490                | yes                                                                      | KC963971                                          | cDNA skin grow.                         | 1 aa changed                                                                     | 822                               |
| <i>EDPQ1-A1</i>      | -                                                                    | NW_003338916.1                           | 1004845    | 1009007      | 1009029                            | 1009616                | yes                                                                      | KC963977                                          | cDNA skin grow.                         | 1 aa changed, 14 aa deleted                                                      | 753                               |
| <i>EDPQ1-A2</i>      | -                                                                    | NW_003338916.1                           | 1004845    | 1009007      | 1009029                            | 1009616                | yes                                                                      | KC963978                                          | cDNA skin grow.                         | 1 aa changed, 17 aa deleted                                                      | 744                               |
| <i>EDCM</i>          | +                                                                    | NW_003338916.1                           | 967397     | 965795       | 965770                             | 965552                 | yes                                                                      | KC963969                                          | cDNA skin grow.                         | no                                                                               | 219                               |
| <i>EDCRP</i>         | -                                                                    | NW_003338916.1                           | 944172     | 947046       | 947067                             | 947963                 | yes                                                                      | KC963970                                          | gDNA                                    | no                                                                               | 897                               |
| <i>EDCQ3</i>         | -                                                                    | NW_003338916.1                           | 903173     | 906936       | 906952                             | 907197                 | no                                                                       | n.a.                                              | n.a.                                    | n.a.                                                                             | 246                               |
| <i>EDCQ2</i>         | -                                                                    | NW_003338916.1                           | 845490     | 848566       | 848592                             | 848804                 | yes                                                                      | KF527459                                          | cDNA dewlap                             | no                                                                               | 213                               |
| <i>EDCQ1</i>         | -                                                                    | NW_003338916.1                           | 836666     | 837511       | 837536                             | 837808                 | yes                                                                      | KF527458                                          | cDNA dewlap                             | no                                                                               | 273                               |
| <i>LOR2</i>          | -                                                                    | NW_003338916.1                           | 821707     | 823476       | 823517                             | 825148                 | yes                                                                      | n.a.                                              | n.a.                                    | no                                                                               | 1632                              |
| <i>LOR1</i>          | -                                                                    | NW_003338916.1                           | 806436     | 808156       | 808210                             | 810338                 | yes                                                                      | KC963979                                          | gDNA                                    | n.a.                                                                             | 2208                              |
|                      |                                                                      |                                          |            |              |                                    |                        |                                                                          | KC963996                                          | cDNA dewlap                             |                                                                                  |                                   |
| <i>EDCC3</i>         | -                                                                    | NW_003338916.1                           | 764824     | 766864       | 766884                             | 767162                 | no                                                                       | n.a.                                              | n.a.                                    | n.a.                                                                             | 279                               |
| <i>EDCC1</i>         | +                                                                    | NW_003338916.1                           | 761018     | 759802       | 759782                             | 759360                 | no                                                                       | n.a.                                              | n.a.                                    | n.a.                                                                             | 423                               |
| <i>EDCC2</i>         | +                                                                    | NW_003338916.1                           | 750529     | 749409       | 749389                             | 748940                 | no                                                                       | n.a.                                              | n.a.                                    | n.a.                                                                             | 450                               |
| <i>Beta li-ac-40</i> | +                                                                    | NW_003338916.1                           | 737643     | 739466       | 739487                             | 740629                 | no                                                                       | n.a.                                              | n.a.                                    | n.a.                                                                             | 1143                              |
| <i>EDSCP</i>         | +                                                                    | NW_003338916.1                           | 285608     | 283193       | 283171                             | 282473                 | yes                                                                      | n.a.                                              | n.a.                                    | no                                                                               | 699                               |
| <i>Beta li-ac-1</i>  | +                                                                    | NW_003338916.1                           | 193285     | 192282       | 192261                             | 191947                 | no                                                                       | n.a.                                              | n.a.                                    | n.a.                                                                             | 315                               |
| <i>EDPSQ</i>         | -                                                                    | NW_003338916.1                           | n.d.       | 169895       | 169922                             | 171817                 | no                                                                       | n.a.                                              | n.a.                                    | n.a.                                                                             | 1896                              |
| <i>EDEPK</i>         | -                                                                    | NW_003338916.1                           | 156653     | 158332       | 158353                             | 158805                 | no                                                                       | n.a.                                              | n.a.                                    | n.a.                                                                             | 453                               |
| <i>EDPKC</i>         | +                                                                    | NW_003338916.1                           | n.d.       | 134653       | 134615                             | 132786                 | no                                                                       | n.a.                                              | n.a.                                    | n.a.                                                                             | 1830                              |
| <i>EDSPR1</i>        | -                                                                    | NW_003338916.1                           | 111589     | 113058       | 113100                             | 113477                 | yes                                                                      | KC963973                                          | cDNA skin grow.                         | no                                                                               | 378                               |
| <i>EDPCS</i>         | +                                                                    | NW_003338916.1                           | 95596      | 93871        | 93833                              | 93222                  | no                                                                       | n.a.                                              | n.a.                                    | n.a.                                                                             | 612                               |
| <i>EDCPGS</i>        | -                                                                    | NW_003338916.1                           | n.d.       | 78061        | 78079                              | 78882                  | no                                                                       | n.a.                                              | n.a.                                    | n.a.                                                                             | 804                               |
| <i>EDCP</i>          | -                                                                    | NW_003338916.1                           | 63381      | 65846        | 65869                              | 66555                  | yes                                                                      | KF270204                                          | cDNA dewlap                             | no                                                                               | 687                               |
| <i>EDSQ</i>          | +                                                                    | NW_003338916.1                           | 36680      | 34690        | 34659                              | 33964                  | no                                                                       | n.a.                                              | n.a.                                    | n.a.                                                                             | 696                               |
| <i>EDEPT</i>         | +                                                                    | NW_003338916.1                           | 28456      | 25211        | 25186                              | 24629                  | yes                                                                      | KF385879                                          | cDNA skin 1                             | 3 aa changed                                                                     | 558                               |
| <i>EDSPR2</i>        | -                                                                    | NW_003338916.1                           | 15803      | 18238        | 18266                              | 18451                  | yes                                                                      | KC963974                                          | cDNA skin                               | no                                                                               | 186                               |
| <i>EDSPR2</i>        | -                                                                    | NW_003338916.1                           | 15803      | 18241        | 18266                              | 18451                  | yes                                                                      | KC963975                                          | cDNA skin                               | no                                                                               | 186                               |

NOTE - n.a., not applicable; n.d., not determined; aa, amino acid residues; EDPQ1-A1 and EDPQ1-A2 are alleles of the same gene. Only the beta-keratin genes (li-ac-1 and li-ac-40) (Dalla Valle et al., 2010) at the borders of the beta-keratin gene cluster are included in this table.

Suppl. Table S2E

## Lizard EDC genes comprising 3 exons

| Gene            | Gene predictions based on <i>Anolis carolinensis</i> genome sequence |                                          |                                    |            |              |                                    |            |              | Experimental data and protein predictions for <i>Anolis carolinensis</i> |                                |                                                   |                                         |                                                                                  |                                   |
|-----------------|----------------------------------------------------------------------|------------------------------------------|------------------------------------|------------|--------------|------------------------------------|------------|--------------|--------------------------------------------------------------------------|--------------------------------|---------------------------------------------------|-----------------------------------------|----------------------------------------------------------------------------------|-----------------------------------|
|                 | Orientation of gene within EDC                                       | Accession number of genomic DNA sequence | Start of coding sequence in exon 1 | Exon 1 end | Exon 2 start | Start of coding sequence in exon 2 | Exon 2 end | Exon 3 start | End of coding sequence                                                   | Expression confirmed by RT-PCR | Accession number of sequence submitted to GenBank | Source of sequence submitted to GenBank | Differences in encoded proteins (relative to prediction from reference sequence) | Length of coding sequence (nucl.) |
| <i>S100A9L2</i> | +                                                                    | NW_003339570.1                           | n.a.                               | 46087      | 47041        | 47059                              | 47202      | 48089        | 48259                                                                    | no                             | n.a.                                              | n.a.                                    | n.a.                                                                             | 315                               |
| <i>SCFN</i>     | +                                                                    | NW_003338916.1                           | n.a.                               | 4640       | 2817         | 2795                               | 2658       | 1926         | n.d.                                                                     | yes                            | KC700627                                          | cDNA toe                                | 3 aa changed, 1 nt inserted                                                      | 902                               |
| <i>S100A11L</i> | +                                                                    | NW_003339599.1                           | 76400                              | 76379      | 75736        | n.a.                               | 75578      | 73631        | 73482                                                                    | no                             | n.a.                                              | n.a.                                    | n.a.                                                                             | 321                               |

NOTE - n.a., not applicable; aa, amino acid residues; nt, nucleotide. Only the S100A genes flanking the region of PGLYRP3, EDKM, SEDC, and SFTPs are included in this table.

Suppl. Table S2F

## Lizard EDC genes comprising 4 exons

| Gene        | Gene predictions based on <i>Anolis carolinensis</i> genome sequence |                                          |            |              |                                    |            |              |                        | Experimental data and protein predictions for <i>Anolis carolinensis</i> |              |                                |                                                   |                                         |                                                                                  |                                   |
|-------------|----------------------------------------------------------------------|------------------------------------------|------------|--------------|------------------------------------|------------|--------------|------------------------|--------------------------------------------------------------------------|--------------|--------------------------------|---------------------------------------------------|-----------------------------------------|----------------------------------------------------------------------------------|-----------------------------------|
|             | Orientation of gene within EDC                                       | Accession number of genomic DNA sequence | Exon 1 end | Exon 2 start | Start of coding sequence in exon 2 | Exon 2 end | Exon 3 start | End of coding sequence | Exon 3 end                                                               | Exon 4 start | Expression confirmed by RT-PCR | Accession number of sequence submitted to GenBank | Source of sequence submitted to GenBank | Differences in encoded proteins (relative to prediction from reference sequence) | Length of coding sequence (nucl.) |
| <i>EDKM</i> | +                                                                    | NW_003339570.1                           | n.d.       | 71464        | 71486                              | 71623      | 74056        | 74157                  | 74190                                                                    | n.d.         | yes                            | KJ569101                                          | cDNA dewlap                             | 2 aa inserted                                                                    | 240                               |

NOTE - n.d., not determined; aa, amino acid residues.

Suppl. Table S2G

## Lizard EDC genes comprising 5 exons

| Gene           | Gene predictions based on <i>Anolis carolinensis</i> genome sequence |                                          |            |              |                                    |            |              |            |              |            |              | Experimental data and protein predictions for <i>Anolis carolinensis</i> |                                |                                                   |                                         |                                                                                  |                                   |
|----------------|----------------------------------------------------------------------|------------------------------------------|------------|--------------|------------------------------------|------------|--------------|------------|--------------|------------|--------------|--------------------------------------------------------------------------|--------------------------------|---------------------------------------------------|-----------------------------------------|----------------------------------------------------------------------------------|-----------------------------------|
|                | Orientation of gene within EDC                                       | Accession number of genomic DNA sequence | Exon 1 end | Exon 2 start | Start of coding sequence in exon 2 | Exon 2 end | Exon 3 start | Exon 3 end | Exon 4 start | Exon 4 end | Exon 5 start | End of coding sequence                                                   | Expression confirmed by RT-PCR | Accession number of sequence submitted to GenBank | Source of sequence submitted to GenBank | Differences in encoded proteins (relative to prediction from reference sequence) | Length of coding sequence (nucl.) |
| <i>PGLYRP3</i> | +                                                                    | NW_003339570.1                           | 61825      | 63203        | 63263                              | 63311      | 63697        | 63907      | 65127        | 65245      | 66003        | 66184                                                                    | yes                            | KC963976                                          | cDNA skin                               | 1 aa changed                                                                     | 561                               |

NOTE - aa, amino acid residues.

**Suppl. Table S3**  
**Primers for 5' RACE**

| Species | Gene  | Primer | Primer sequence       |
|---------|-------|--------|-----------------------|
| Aca     | LOR1  | SP1    | CATTGCTTCGTTTGGCTAAG  |
|         |       | SP2    | GCCACCTGAGCCACCTCCT   |
|         |       | SP3    | AACTCTGACGTCGACGAGAAC |
| Aca     | EDCRP | SP1    | AAGGACCCCATACACGAAGAG |
|         |       | SP2    | GGTGCATTGAAAGCATAGCTC |
|         |       | SP3    | CACAGCAGCTTTGCTTGC    |

NOTE - Primer sequences are shown in 5'-3' direction; Aca, *Anolis carolinensis*.

**Suppl. Table S4**  
**PCR Primers**

| Species | Gene            | Forward Primer          | Reverse Primer         |
|---------|-----------------|-------------------------|------------------------|
| Aca     | <i>CASP3</i>    | CAAGGATGATCACCACAAGAG   | CCTGTCTGCAGATGACAAGAG  |
| Aca     | <i>EDCM</i>     | CGAACTTCCTACACTTGAGCA   | TGGCAAGATGAGCACAAAAG   |
| Aca     | <i>EDCP</i>     | GGTCCATTTGATCCCTTTTG    | TTGCATATCACTGGCTCTGC   |
| Aca     | <i>EDCQ1</i>    | CTGATACACATTGACCTTTTG   | CTTTCTCTGTTGTGGCAAGAT  |
| Aca     | <i>EDCQ2</i>    | ACACTTCTCAGGCAGGACTTG   | GAATACCGCCAAAGCGTGCAA  |
| Aca     | <i>EDCRP</i>    | TTGTCTTACTACCACTTACACGC | CTTTGCTTGCAACAGGGGGT   |
| Aca     | <i>EDEPT</i>    | CCCGGCACCAAGAAAGTT      | GGTACCAGACGGATCCAAGA   |
| Aca     | <i>EDKM</i>     | AGAACATCAAGGAACCCAAAG   | CATTTATGGTTGCTCTGCATG  |
| Aca     | <i>EDPQ1</i>    | CAACAGACGTATTCGCGATC    | GCTGGAGCATGAGAAGGAAG   |
| Aca     | <i>EDPQ2</i>    | AGACGCAGCTCTTCCTTCCT    | ACACTTTGGATCCTGGCATT   |
| Aca     | <i>EDPQ3</i>    | CTTGATTCTGCCTTCCTTG TG  | GGGAGGGACAGTTTTCTTG    |
| Aca     | <i>EDSC</i>     | CTTGACCAAAGCTTCTCAGTG   | AGGAATTATGCAGTAGACGTTG |
| Aca     | <i>EDSPR1</i>   | CTTTGGCTTGCGTTGAGT      | AATGCAGGCAAGAGCTTGTT   |
| Aca     | <i>EDSPR2</i>   | TTCACTCAGCTCCGTCGTG     | CGTTCAACGAGGGAAGGATC   |
| Aca     | <i>EDWM</i>     | CTGGTTCTAACCTCCCCTCA    | ATGGGTCTCCCCCAGTAATC   |
| Aca     | <i>LOR1</i>     | TCCTCTGGTTGCAGCTGCT     | CTTCTACCACAGCATGAACTGC |
| Aca     | <i>LOR2</i>     | CTCTTGACACATCCATTCAAG   | GAGCCTCGGATTTGTTGGATC  |
| Aca     | <i>PGLYRP-3</i> | GAGAAAGCCACCGCTCTTAG    | TCGACCAAAGAGTGCAGAGA   |
| Gga     | <i>CASP3</i>    | TGGCGATGAAGGACTCTTCT    | CTGGTCCACTGTCTGCTTCA   |
| Gga     | <i>EDbeta</i>   | CTTATTTCTGTTGCGCAGT     | TTCTTTGGTCCTTCCAAAC    |
| Gga     | <i>EDCH1</i>    | GACACTCCTCTTGTGCTG      | CGACCTCATCCTCAGTG      |
| Gga     | <i>EDCH4</i>    | CATTCTGTTGCTGAAAGG      | GGAATTGGGGTTTCCAG      |
| Gga     | <i>EDCH5</i>    | CTCAGCCATCCACCAGCA      | CTCGATGTCGTGGCTGAG     |
| Gga     | <i>EDCRP</i>    | CTCAACTGAACCCCTCAGTTAG  | CAGCACACTGTCTTGCTCTTC  |
| Gga     | <i>EDDM</i>     | CTTGTTCCCTGGTGGTGAATCG  | CAAGGCAATCTGCCTCAAGTC  |
| Gga     | <i>EDGH</i>     | ATGTGTTTCCAATGGCTGAGG   | GTCCCAGTGCTGGAAGC      |
| Gga     | <i>EDKM</i>     | GACCAGCAGCTCCACTCCGAC   | TAGGTGGAGTGGGGCACGTCC  |
| Gga     | <i>EDMPN1</i>   | CCACTTCTCCTCACC GTTCAG  | CGTATCCATGTCCATATCCAG  |
| Gga     | <i>EDMPN2</i>   | CCTGTTCTCACTGGTCAACAG   | GCAAGAAGCCAGGTGGGAAGC  |
| Gga     | <i>EDMTF1</i>   | TCTCCTGCCTTAGCTCCTTG    | CAAGCCATCTTCGTAGCACA   |
| Gga     | <i>EDMTF4</i>   | CTCACCTTCCCTCCTCCTGGT   | GGGCTCTGTGCATTAGGAAG   |
| Gga     | <i>EDMTFH</i>   | TCGCTTCTCTCGAGTTCCTC    | TCACTGAACACAGCCAGAGG   |
| Gga     | <i>EDPE</i>     | ACTTCTCCCCGTTGACTGGT    | GGCAATGGCTCTGTTTCTTC   |
| Gga     | <i>EDQCM</i>    | TCCCTCACTCACTTGTGCTG    | GTAGGTCTGTCATCTGTATTTT |
| Gga     | <i>EDQM1</i>    | CCTTCCTCTCGCCTTCTTCT    | CTGCTGAGAGCCCTCTGC     |
| Gga     | <i>EDQM3</i>    | TCTGAGCAACCTTTCCAGAC    | TGTGCCCTGCAGAGATGA     |
| Gga     | <i>EDQrep</i>   | TCACAACGCTGTTCTCATCG    | GCACAAGCGGTACAGTAGC    |
| Gga     | <i>EDSC</i>     | CCCCTTGAGCTCTCACTGAA    | CGTGTCTCCCAGCACTCATA   |
| Gga     | <i>EDWM</i>     | CTACCTTCCCTCATCACTTG    | GAGTGGGGATGAGTGAGAAAT  |
| Gga     | <i>EDYM1</i>    | TCTTACTCTCCTCTCTGAGCT   | GCATCTTGCTCTTCATCCATC  |
| Gga     | <i>EDYM2</i>    | GTTGTTCTCACTGATGAAGTC   | TCACAGGACTGCAGAGGTTG   |
| Gga     | <i>LOR1</i>     | TCCATTGGACTTCCTTCAGC    | CCAAAGGAGGACGATGATATG  |
| Gga     | <i>LOR2</i>     | CTCAGAGTTGCGCTGTTGAA    | CTGTGCCTGGTAGCTGGAG    |
| Gga     | <i>LOR3</i>     | GCACACATCCAGCTGTGTT     | GGACTGGGAAGATGACTCGT   |

NOTE - Primer sequences are shown in 5'-3' direction; *CASP3* (caspase-3) is a ubiquitously expressed gene (Eckhart et al., 2008) located outside of the EDC; Gga, *Gallus gallus*; Aca, *Anolis carolinensis*.

**Suppl. Table S5****Number of EDC protein-derived peptides identified by mass spectrometry in cornification products of the chicken**

| Protein | Beak |    |     |    |     |   |     |    | Claw |   |     |    |     |   |     |    | Feather |   |     |    |     |   |     |   | Scale |   |     |    |     |    |     |    |    |    |   |    |   |   |
|---------|------|----|-----|----|-----|---|-----|----|------|---|-----|----|-----|---|-----|----|---------|---|-----|----|-----|---|-----|---|-------|---|-----|----|-----|----|-----|----|----|----|---|----|---|---|
|         | # 1  |    | # 2 |    | # 3 |   | # 4 |    | # 1  |   | # 2 |    | # 3 |   | # 4 |    | # 1     |   | # 2 |    | # 3 |   | # 4 |   | # 1   |   | # 2 |    | # 3 |    | # 4 |    |    |    |   |    |   |   |
|         | I    | S  | I   | S  | I   | S | I   | S  | I    | S | I   | S  | I   | S | I   | S  | I       | S | I   | S  | I   | S | I   | S | I     | S | I   | S  | I   | S  |     |    |    |    |   |    |   |   |
| EDbeta  | 0    | 5  | 0   | 5  | 0   | 9 | 0   | 0  | 0    | 8 | 0   | 5  | 0   | 0 | 0   | 0  | 0       | 0 | 0   | 0  | 0   | 0 | 0   | 0 | 0     | 0 | 0   | 0  | 0   | 0  | 0   | 0  | 0  | 0  | 0 | 0  |   |   |
| EDCH3   | 0    | 0  | 0   | 2  | 2   | 0 | 3   | 0  | 3    | 0 | 3   | 0  | 0   | 0 | 0   | 0  | 0       | 0 | 0   | 0  | 0   | 0 | 0   | 0 | 0     | 0 | 0   | 0  | 0   | 0  | 0   | 4  | 0  | 8  | 0 | 8  | 0 |   |
| EDCH4   | 18   | 9  | 20  | 7  | 17  | 4 | 31  | 0  | 21   | 0 | 19  | 0  | 24  | 0 | 16  | 0  | 0       | 3 | 0   | 4  | 0   | 0 | 5   | 0 | 28    | 0 | 28  | 0  | 36  | 5  | 34  | 0  | 0  | 0  | 0 | 0  |   |   |
| EDCH5   | 0    | 0  | 2   | 0  | 6   | 0 | 4   | 0  | 0    | 0 | 3   | 0  | 4   | 0 | 3   | 0  | 0       | 0 | 0   | 0  | 0   | 0 | 0   | 0 | 0     | 7 | 0   | 11 | 0   | 10 | 0   | 6  | 0  | 0  | 0 | 0  |   |   |
| EDCRP   | 0    | 0  | 0   | 0  | 0   | 0 | 0   | 0  | 0    | 0 | 0   | 0  | 0   | 0 | 0   | 0  | 0       | 0 | 0   | 7  | 0   | 2 | 0   | 0 | 0     | 0 | 0   | 0  | 0   | 0  | 0   | 0  | 0  | 0  | 0 | 0  | 0 |   |
| EDDM    | 0    | 0  | 0   | 0  | 0   | 0 | 0   | 0  | 0    | 0 | 0   | 0  | 7   | 0 | 5   | 11 | 11      | 6 | 7   | 11 | 9   | 9 | 9   | 9 | 0     | 0 | 0   | 0  | 0   | 0  | 0   | 0  | 0  | 0  | 0 | 0  | 0 | 0 |
| EDMTFH  | 0    | 0  | 0   | 0  | 0   | 0 | 0   | 0  | 0    | 0 | 0   | 0  | 0   | 0 | 3   | 0  | 0       | 0 | 0   | 0  | 5   | 0 | 2   | 0 | 0     | 0 | 0   | 0  | 0   | 0  | 0   | 0  | 0  | 0  | 0 | 0  | 0 | 0 |
| EDMTF4  | 0    | 4  | 0   | 3  | 0   | 4 | 0   | 6  | 0    | 3 | 0   | 2  | 0   | 4 | 0   | 2  | 0       | 0 | 0   | 2  | 0   | 2 | 0   | 3 | 0     | 0 | 0   | 0  | 0   | 0  | 0   | 0  | 0  | 0  | 0 | 0  | 0 | 0 |
| EDQrep  | 0    | 0  | 0   | 0  | 0   | 0 | 2   | 0  | 0    | 0 | 0   | 0  | 0   | 0 | 0   | 0  | 0       | 0 | 0   | 0  | 0   | 0 | 0   | 0 | 0     | 0 | 17  | 0  | 12  | 0  | 15  | 0  | 11 | 0  | 0 | 0  | 0 |   |
| EDWM    | 18   | 15 | 20  | 15 | 30  | 4 | 39  | 13 | 26   | 0 | 26  | 13 | 24  | 0 | 21  | 0  | 0       | 0 | 0   | 0  | 0   | 0 | 0   | 0 | 0     | 0 | 60  | 23 | 53  | 13 | 64  | 11 | 47 | 19 | 0 | 0  | 0 |   |
| EDYM1   | 19   | 18 | 39  | 21 | 45  | 8 | 52  | 18 | 35   | 3 | 40  | 13 | 34  | 0 | 40  | 0  | 0       | 0 | 0   | 0  | 0   | 0 | 0   | 0 | 0     | 0 | 0   | 0  | 0   | 0  | 0   | 14 | 0  | 0  | 8 | 26 | 0 |   |
| LOR1    | 0    | 0  | 0   | 0  | 0   | 0 | 0   | 0  | 0    | 0 | 0   | 0  | 0   | 0 | 0   | 0  | 0       | 0 | 0   | 0  | 0   | 0 | 0   | 0 | 0     | 8 | 0   | 6  | 0   | 0  | 0   | 0  | 0  | 7  | 0 | 0  | 0 |   |
| LOR2    | 0    | 0  | 0   | 0  | 0   | 0 | 0   | 0  | 0    | 0 | 0   | 0  | 0   | 0 | 0   | 0  | 0       | 0 | 0   | 0  | 0   | 0 | 0   | 0 | 0     | 0 | 0   | 0  | 0   | 5  | 0   | 4  | 0  | 0  | 0 | 0  | 0 |   |
| LOR3    | 0    | 0  | 0   | 0  | 0   | 0 | 0   | 0  | 0    | 0 | 0   | 0  | 0   | 0 | 0   | 0  | 0       | 0 | 0   | 0  | 0   | 0 | 0   | 0 | 0     | 0 | 0   | 52 | 0   | 28 | 0   | 38 | 0  | 0  | 0 | 0  | 0 |   |

NOTE - Beak, claws, feathers, and scales from the leg were derived from 4 individual chicken. I, insoluble fraction; S, soluble fraction.

Suppl. Table S6

## Comparison of SEDC genes characterized in this study and similar genes annotated in the GenBank (July 2014)

| Species | This study    |              | GenBank (July 2014) | Product                                            | Comparison: newly characterized genes versus GenBank annotations |               |                                   |
|---------|---------------|--------------|---------------------|----------------------------------------------------|------------------------------------------------------------------|---------------|-----------------------------------|
|         | Gene          | Gene         |                     |                                                    | Exon borders                                                     | Coding region | Notes                             |
| Aca     | <b>EDCQ1</b>  | LOC103280362 |                     | uncharacterized LOC103280362                       | identical                                                        | different     | ORF not defined in GenBank        |
| Aca     | <b>EDCRP</b>  | LOC103280368 |                     | keratin-associated protein 4-7-like                | different                                                        | identical     | exon 1 not defined in GenBank     |
| Aca     | <b>EDSPR2</b> | LOC103280358 |                     | uncharacterized LOC103280358                       | identical                                                        | different     | ORF not defined in GenBank        |
| Aca     | <b>LOR2</b>   | LOC103280361 |                     | loricrin-like                                      | identical                                                        | identical     |                                   |
| Gga     | <b>EDbeta</b> | LOC101748031 |                     | claw keratin-like                                  | identical                                                        | identical     |                                   |
| Gga     | <b>EDDM</b>   | LOC101751279 |                     | keratin-associated protein 10-4-like               | different                                                        | identical     |                                   |
| Gga     | <b>EDMPN1</b> | KRTAP10-4    |                     | keratin associated protein 10-4                    | identical                                                        | identical     |                                   |
| Gga     | <b>EDMPN2</b> | LOC101747731 |                     | keratin-associated protein 5-1-like                | different                                                        | identical     | exon 1 not defined in GenBank     |
| Gga     | <b>EDNC</b>   | LOC101751222 |                     | mucin-2-like                                       | different                                                        | identical     | exon 1 not defined in this study  |
| Gga     | <b>EDPE</b>   | LOC101751113 |                     | titin-like                                         | different                                                        | identical     |                                   |
| Gga     | <b>EDQCM</b>  | LOC101751162 |                     | keratin-associated protein 9-1-like                | different                                                        | identical     | exon 1 not defined in GenBank     |
| Gga     | <b>EDWM</b>   | LOC425969    |                     | loricrin-like                                      | identical                                                        | identical     | part of coding sequence different |
| Gga     | <b>LOR1</b>   | LOC101747961 |                     | probable serine/threonine-protein kinase kinX-like | identical                                                        | different     |                                   |
| Gga     | <b>LOR2</b>   | LOC101747853 |                     | loricrin-like, transcript variant X1               | identical                                                        | identical     |                                   |
| Gga     | <b>LOR3</b>   | LOC101747796 |                     | loricrin-like                                      | different                                                        | identical     | exon 1 not defined in GenBank     |

NOTE - Gga, *Gallus gallus*; Aca, *Anolis carolinensis*.



# A

## >Aca\_EDCC1

MSCCGGGCCGGCCGGYGGYGGSGHGAGGGGGSFVGYTLGRDIHVTPEGECYMITPEGYLRDCCGVSVCCHCVCVDCCCCGS  
GGYGGYGGYGGGCGGGGLEVDIIGESRNITMPATYLCSRVHCAESCCCTCEPCCCTC

## >Aca\_EDCC2

MACCGSGCCGDCCGGGYGGYGGYGGYGGDGGVLAAGVFNKNVHVRDHGCTMVFPTFYITNNGDFRMCREVCAHECCKPCC  
CGGGYGGYGGGDDGGYGGQGLRVDMRQAGSTVHVPGSYLFSYPCASSCTECCDPCCCSCGGPC

## >Aca\_EDCC3

MACCMSSCTSHGGGLGSNNDDGAVLVGWTSDKVVVRVSPGRSSLLIPPPSAKTTNQPRISCHIVRCLGVNGEMVWLNRQNYG  
LIHSTLQVVR

## >Aca\_EDCM

MSCCSRCSGARSGCCCCHRSKPRVVYYVRRQVPMVPCCGGGQYSYSYVARSCCCAPRRLEIQOCTMDEVKKY

## >Aca\_EDCP

MSYQCKQRCLPPPWWKGNISIKCAEVCAVISKSPCKSVSSSDPCGSSCTTAKDLCGAFPCQFVCCDPCVKVEKCPDPCCAKAEF  
VICKSPCVSVCPAPCSPEFVKCKSPCASVCDATCEEAAACGCQGQSGVCOFQSCFFFCVAFQCGQSLPFQGNPCQGQSYIFVY  
IPGCGVVLVPPQSCCLNFCASSCPCCQPFCCCPVPSCCNPSCCSQPASCAKCSGSCPCKQSS

## >Aca\_EDCPGS

MPYQQLQSNQTSAAFSGCVKSYTTECFQLCHPQCGPQCGPTCGCHGGPNCGCPCGPNCRCPGGPSCGSCCGPSCGCHGGSNCG  
CPGCFSCGCPCVPCCGCPGPPSCGCGQSGPNCGCPCGFSCGCRGGPNCGCPCGPNCKCPHNFTCGYPCGFSGGASCSPICNQPC  
GFSGCFCHPSCGFSWAFAGGKSCGFTCALSGGTSCEPSCGKTCVPSGGISYGFSRKTSCEPNCGQTSGSSCAATCGSSSAIK  
SEKCDTKSKDSCSTKEK

## >Aca\_EDCQ1

MCSRGRDRDCHKPQQEAFSCHRGRSSCHEEKERSCHNRESSPGCGSRQFSCGAKFVPSQQQTPGVVVPPFCQQQQQVQKQFTQ  
WPSQNQK

## >Aca\_EDCQ2

MCSRNDLAPQKNPFPQEEEEERSSCGKRETSSSCCSRKPSSEPPAVSFPSCQEKQVVKQFTQWPPQNAK

## >Aca\_EDCQ3

MGRCCRCCHRERCGGSRHGCHEHECERTTVLCCKPPCRVPPPCMPFVQCGVPPMOCVQSCQLPAQVKAICIPAQKSCCQTKP

## >Aca\_EDCRP

MSCNNCCSCCCTPCCKQSSCKQSSCQOCCCTPCCKQSCCDPCCKTKCEPCKTKCCDPCKTKCCDPCKTKCCDPCKTKC  
CDPCCKTKCCDPCKTKCCDPCKTKCCDPCKTKCCDPCKTKCCDPCKTKCCDPCKTKCCDPCKTKCCDPCKTKCCDPCKTKCC  
PCKPQCCPCKPQCCPCKPQCCPCKPQCCPCKPQCCPCKPQCCPCKPQCCPCKPQCCPCKPQCCPCKPQCCPCKPQCCPCKPQCC  
CEPCEPCKPQCCPCKPQCCPCKPQCCPCKPQCCPCKPQCCPCKPQCCPCKPQCCPCKPQCCPCKPQCCPCKPQCCPCKPQCCPCKPQCC

## >Aca\_EDEPK

MSTEETDQOKKQSSTLPPALSTFSSFPIDREEPALPPPNEPEVPEEKKKEEPEKKESSPPQPDTEPDESETSKEDISSGN  
EREKPPPETEQQPPEETLPRALSQETLKVDRSSPLEVTEDVSNQAPPVVEVEDKQQQRKQFSTWPLK

## >Aca\_EDEPT

MSYQARQPCAPPYQETSAPPYIPQCSDBSPCSEGASASSYQYTQPSVPPCCPQSSPTEILDASTSPCVSFHTVIDGETLT  
EVSSPTECESATTOPEPQTLPOPSPVEIRETPISPCVAVYATEPLEEPAPREEPTRNYVMPGSIVILDESGTITVKPGDDEE  
ECAGARESVFVAEYTHFS

## >Aca\_EDKM

MSRLIRAFTDMMEGNHKSNPKKVKAEETFKSEFKKLIQOELSPVQRSSSSKYKNMKNALDSDAELMTDKETVPCAY

## >Aca\_EDPCS

MSFFPESVEVFPILLDGGNLVLVKQTFDCGPLKSSYLRLSLGSPSKYISHCPCPCPCPPSCLSPCRPRCLPNCGPCYGRFQC  
LSPCRFICSSPCRPICFYPCQPSVSPCYQRPQFRFICVNPQSPCSVSCPYFYSFLCPPSCIENCFYQCOYPRSSICVQ  
PACVYFVGQVSCSICGYPCSPRGYLYENFEVYYLG

>Aca\_EDPKC

MASHNEFQSKQKHSLEPFLALCKKAPETLCPPEQEDAPPEEVHQCKQTISSFPAMWPHKTHSPQEKPPCKESEVVAAPNFCSPQPE  
EPCKHFSIVTVPTPCDFVPEKKSFCCKEKPTEIVPIPCCKPKDSSPQEKPHCKEAPAHVGFPTPCSQQKSFESKESPCCPQPEAV  
PCPQQKQPCKETVESEFTPCPQHKPPTKDSFCCPPEFVPCAQEKKPKKETPVEVVPTPCPQQKQPLKESFCCQSEFASCA  
QEKQPCKEPPVHIVPTFCQQKSFESKESFCCPQAEVPCAQEKQPCKEPPVHTVPTPCPQQKQPKESFCCPTPEAPCAQEK  
QPCKVPFVHIEVPCPQQKQPCKETFAEVVPTPCPQEKPTKDSFCCPPEFVPCAQEKQPCKETPVEAVPTPCPQQKSFESKES  
FCCPQAEVPCPQQKQPCKDTFIVTITPCPDPVPGPEKKSPCREPPKEVVPTPCCKSFIDSPEEKPHCKEPPAHIVPTPCA  
QQKQLKESPCCPTESEFAPCAQEKQPCKVPFVHIAPTPCPQQKPEAKESFCCSQPEEPEPCKQPPKTTVPTCEPEKRSCKEP  
TPTAFSTKCPPIEQHQKQPCYWHHK

>Aca\_EDPQ1-A1

MSSSGFNSCEDACNDYGSYMVSGSCGGCSGGRSLCSEFSCGASGSSCCSGRSRTMGSCCRPPSQQYCPFMQKYCPPVQYVQPP  
VQKCSLFPQQKYCPPVQKCSPPQKCCCLFVQKCSPPQKCCPPVQKCCPPQKCCPPVQTCYPPQKCCPPVQTCYPPQKCCP  
FVQKCCPPQQYCPFVQTWYPPQKSCPPVQSCGPPVQSYAPSOQCCSSTQOYSQQGHQGYVTIGGPAICQTKQVCAPPGLLK  
K

>Aca\_EDPQ1-A2

MSSSGFNSCEDACNDYGSYMVSGSCGGCSGGRSLCSEFSCGSSCCSGRSRTMGSCCRPPSQQYCPFMQKYCPPVQYVQPP  
CSLFPQQKYCPPVQKCSPPQKCCCLFVQKCSPPQKCCPPVQKCCPPQKCCPPVQTCYPPQKCCPPVQTCYPPQKCCP  
KCCPPQQYCPFVQTWYPPQKSCPPVQSCGPPVQSYAPSOQCCSSTQOYSQQGHQGYVTIGGPAICQTKQVCAPPGLLK

>Aca\_EDPQ2

MSYQQQCKQPCQPPPSCCKKTCPPEQEVCPPEQKVCPPPEQECPPPEKVCPPPEQECPPPEKVCPPPEQECPPPEKVCPP  
VCLPPEQECPPPEKQECPPPEKMCFAPEQVCPPEQEYLPPEQECPPPEQVCPPEKQGLPQQCQDPKCC

>Aca\_EDPQ3

MSSDSFQCTQPCAKAPPCKKKTVPFPPECCPPFQKCCPPFQECPPFPKCCPPFPKCCPPFQECPPFPKCCPPFPKCCPP  
PPQQCCPPPPQCCPPPPQCCPPPPQCCPPPPQCCPPPPQCCPPFPKCCPPFPKCCPPFPKCCPPFPKCCPPFPKCCPPFPKCCPP

>Aca\_EDPSQ

MYCTDQCKQAACLPPESYQKIVGTQDISGCGPRYRCQRGQSYTQCISFCPPQQRHSYVFPVSPQSCSPQROPSYPLQHRPTFV  
PKWIQFSCPLQHRPAFALDCIQPPRLQCRSSFSFDSIQFVPPQLQRSSFSFSDTIQFVPPQLSRPFAFALDCIQPPSPIQNL  
LAFDHLQFASPPHSPKSSSSDSIQFSYHGLFSIVFDHIETTCCPQROPPCSSDTLQFSYPPQRKFSFTFSYPPQSPPCSS  
DTLQFSYPPQRKPCSSDTLQFLYPPQRKFSFTFSYPPQSPPCSSDIQFLYPPQRKFSFTFSYPPQSPPCSSDTLQFSYPP  
QRKPCSSDTLQFLYPPQRKFSYTLQFQQKPPCSSETLQPSYPLQRRFSFTFSYPPQSPPCSSDTLQFSYPPQRKFSYTL  
PWIQPCSSQGEASYEPPCPRPSFPERLSPPQSIQFYASFPQKYQYTKQPCPPCKSVCFGSQQTRMPQAVQTCAKPKKCVSQ  
GFLGSCSQGAIKGNQGVKGGQQYGSQQCIKGGVGTITKSVQCCACQPGIMKGGCGQQYGSQFIFTKGVSSAGKAMAIQQ  
GASQAYVTKGGPFAVKSSPQWSSQPCISKGGPMYATKSGQGYIRKGTKW

>Aca\_EDSC

MSQQVQRGSSCCCSAACCGRSGGCCSSRSRSGGCCSGRRSSGGCCGSSRSRSGGCCGSSSGGKYVQQAQASAGCGSSSGCCG  
GSSSSGCCSGGLSQQKQVKMCPQQLK

>Aca\_EDSCP

MVSCGSIPLSCIAPSGSTRSVTRRISGGISSGNYSCEVQHYAVRSCSIPYYSIQPLSCQPSGCISSCNYSCEPVEHCVVRPCP  
VYYSIQPLSCQPSGCISSCNYSCEPVEHCVVRPCPVEYYSIQPLSCQPSGCISSCNYSCEPIEHCVVRPCPVEYYSIQPLSC  
QPSGCFSPCNYPCEGTESESGVQSESIQYYPISVSCQPSGCVQSSCAPSCYTIQVQSCNFCSSFC

>Aca\_EDSPR1

MACPHQCKQPCLPPLCGKGLPKSCKGCPPIGCVFSCSGQSTCVSFCSPCTKKSFCSTPCSKVLPCCSPCAPCSFTCAA  
PFCAPKCCPQOHVVPCVEAQAVCPKCAQACAPLSFCSKKSH

>Aca\_EDSPR2

MSQQCKQGCKAPPCMPKCAPKSSPCCSFSAAKCPRKCNPCPPQTVVKCPPKCKQPPKGCC

>Aca\_EDSQ

MSYQVKQASLPPPTYQKKNATATATSQAPASVSVCTFSVCATPSSLCMTFSSQSYGSSGCQCQGSQKSSQWQRGSMGHDSSR  
TPQQEYSQCSSPMVATPCSSLCFSQGSQGGQSQGGQGGQRRPVRFDQYGTICVLPQQQLQTVTVQDPCGNISVIFQKR  
DPGKNAGTSVCGSC

>Aca\_EDWM

MCESRIYAAGREYFNLNSWTWYDAGSWLDTRRKPFHYTVNTSCVPCCNKNNNCDVRRGGHNYRCYSYRQSTCTPECNRLP  
CGFRNFGGPRDYWRIGDSCDGRGGYYSNEESVNGSCCRASGGCGSGGACAKPSSISGGCGGVCAEFGCQSSGRCGGR  
RRGLCSEFGCGLFRRRRSVCSSETCSRSSRGCGSGGCAGFQISFSGCGGRGLCSEFGCGIARRRQSVCSETYSRSSRGCCFYA  
RGAQVGPQSSVSGCGARGVCSSEL

>Aca\_LOR1

MSQQRQSSGCCRGGGGGGGGGGSSCCGRRSGSSSSSSSSCCSSSRSSGQQSQGSMCCGGGGGGGGGGGGGGGQKIIII  
VSSGGSSGGGQCCCGGGGGGGSSGGGSGQIIISGGGGSGGQSSGSCGGSSGGSSGGGQQKIIPCCGGGGGGGGGGGGGKIIIG  
GGSSGGGGGGGGGGGGGGGGGSMGGSSGGSSCGMGGSSGGGGGGGGGGGGGGGKIIIGGGSSGGGGGGGGGGGGGGGSMGGG  
SSGGSSCGMGGSSGGGGGGGGGGGGGGGGKIIIGGGSSGGGGGGGGGGGGGGGSMGGSSGGSSCGMGGSSGGGGGGGGGGGKII  
GGSSSSGGGGGGGGGGGGGGGGGSMGGSSGGGGSSGGKTIICGGSSGGGQSSGGQSSGGQSSGGQSSGGQSSGCCMGGSS  
GSGGGGGQTIIVPCGGSSSGGQSSGGQSSSSCMGGSSGGGGGGGGGGGGGGGQNSGHQTIIVSCGGSSGGGGQSSRRRQSSG  
GQSSSSCMGGSSGGGGGGGGGGGGGGGGQTIIVPCGGSSGGGGGGGGGGGGGGQSSSSCMGGSSGGGGGGGGGGGGGQNSGHQ  
TIIVSCGGSSGGGGQSSGGQSSGGQSSGCCMGGSSGGGGGGGGGGGGGGGGQTIIVPCGGSSGGGGGGGGGGGGGGQSSSSCMGGSSSSGGGG  
GGSGGQTIIPCCGGSSGGGGGGGGGGGGGGGGQSSGCCGGGGGGGGGGSSSMQSKQSFSPACLSTKQMNTPSGQK

>Aca\_LOR2

MSQQRQSGCCGSNRSRRCGRRSGSGSSCCGGSSGGGGSSCGRRSGSSGCGSSVGLAQQVSGSSCGRRGSSSSCCGSSVGI  
AQVSGGYGGSCSSGGSGQGVVIVSGGQSSSCGSSGGIQIRSGCCSGSSGGAVIIPAGVGGQSSCCVGGGYGSGMGQ  
QKIIVIDSGFGSGGIGGGSSGGGLGGQSIIVPVS GSSGGCYGGQVIGSGISSASGCCSDAGVGGVVIIGGSSGRVSP  
VCGGVSGGGVKVIIGSSGRVSPVCGGVVSGGGVKVIIGSSGRVSPVYGGASCGGVKVIIGSSGRVSPVYGGASCGGVKVIIG  
GSSGRVSPVYGGASCGGVKVIIGSSGRVSPVYGGVSGGGVKVIIGSSGGGGSI CGGVSGGGVKVIIGSSGGGGSI CGGGL  
SDGGVKVVGSSGRISPVYGGVSGGGVKVVGSSGGGGSI CGGGLSGGGVKVIIGSSGRVSPVCGGGGGQTIIVSSGGSSGG  
CCGGASSGTSVVVGGGGSSQVKVPLVVPCLGQTKQVTSLPPSCK

## B

>Gga\_EDbeta

MTHSLSPCTDGSFSLCGVAVPQPVANSNEPCVVQCDFDSTVVIYPPFVVTIIPGPIILSTFPQQSTVGSVGAPEVASGLSSAPAE  
PQGLQVSGGARWARGYFVGSQPC

>Gga\_EDCH1

MGSSSECHSQNPSCSHSHACNDSGPSCSHSSQNIIPAFXYACVXPCSPFAQTYCVPTQCYPPAVQTCPQNTNAACNLPCCPKF

>Gga\_EDCH2

MCSRGSCHSHETSCHGSRSSCHDSEFCHYTIQRVSPVKYTYMTPCCPPVQTF CPPVQRYCPPVQPCPPVKTYCPPIFPCP  
QYTKNICKLPCCPKF

>Gga\_EDCH3

MCSRGSCHSHETSCHGSRSSCHDSEFCHYTIQRVSPVKYTYMTPCCPPVQTF CPPVQRYCPPVQPCPPVKTYCPPIFPCP  
QYTKNICKLPCCPKY

>Gga\_EDCH4

MCSRGSCHSHETSCHGSRSSCHDSEFCHYTIQRVSPVKYTYMTPCCPPVQTF CPPVQRYCPPVQRYCPPVQRYCPPVQRYCPPVQRY  
KLPSSFPKY

>Gga\_EDCH5

MQYRKGEDNDVDC HDDTTCCGCHDGVSIPLDLSPCHDRSSLSHDIEGSCQSVPPQGCQIEPCPPRGCCPAQRSDWCGKPRRRVE  
VSPVQFVCPVVKIHRRLQOQYRPPLOSEEQGCCPKRRRVEQCPSEEPITLHPLPLQHRCP CIPYCRPPVQHRPPVQHRPPV  
QHCCPTAVPLPQHFGHQCKQVHILPPFQOKK

>Gga\_EDCRP

MCFNVCCSSGCCSVVKSKTVCCSFCQKTVCCDFCQKTVCCDFCQKPCCDFCQTCDFCQKPCCDFCQTCDFCQKPCCDFCQTCDFCQKPCCD  
CDPCQTCDFCQTCDFCQKPCCDFCQSSVCCDFCQKPCCDFCQTCDFCQKPCCDFCQTCDFCQKPCCDFCQTCDFCQKPCCDFCQTCDFCQKPCCD  
TVCCDFCQKPCCDFCQTCDFCQKPCCDFCQTCDFCQKPCCDFCQTCDFCQKPCCDFCQTCDFCQKPCCDFCQTCDFCQKPCCDFCQTCDFCQKPCCD  
CCDFCQTCDFCQTCDFCQKTVCCDFCQKTVCCDFCQKPCCDFCQTCDFCQKPCCDFCQTCDFCQKPCCDFCQTCDFCQKPCCDFCQTCDFCQKPCCD  
CRFCCSSGRLSCCSVVKKKPVVVCCSFVQYCSPLRKCCEVIRQCCITVVKCC

>Gga\_EDDM

MLCQTDQQRGLPECLPFHVVLVRNLFVSRSDVDCNSVSVSRLNTCADFCYYARVPQGTTTYLKLGS CDLRQIALDFCCLGITTT  
LTDPCQDQVTRCSSTRCVDPCCKVTEFCSSSTRYVDSCCQDATQCTTRCVDSCCQDATQCTTRCVDPCQDQVTRCCTTRCVDPCR  
QDATQCTTRCVDPCRQDATQCTTRCVDPCQDVTCTTRCVDPCRQDQVTRCCTTRCVDPCQDVTCTTRCVDPCRQDQVTRCCTTRCVDPCR  
QDVTCTTRCVDPCCKEVTRCTTRCVDPCQDVTCTTRCVDPCCKEVTRCTTRCVDPCCKEVTRCTTRCVDPCCKEVTRCTTRCVDPCCKEVTRCTTRCVDPC  
GEVTRCTTKYVDFCCRVTTRCATTVDPCGRVTKCTNKVDFCYGAVTRCSTKCEVPCCEVSKCTSRQVDPCREVTCTT  
RCVDFCCGRVTKCARYKNPCCGEVSKCTTKCVDPCGRVTKYVDFCCREVTSCKTRCVDPCCKEVTRCTTTCVDPCCAEVTRC  
ATKCIDPCQDATKCTTTCVDPCCREVTCTTTCVDPCCEVTCTTTCVDPCCKEVTRCTTTCVDPCCEVTCTTTCVDPCCEVTCTTTCVDPC  
CREVAKCTTTCVDPCQDATQCTTRCADFCCQDVTCTTTCVDPCVDFCFVTRPTEL CASICGRHYSIS CADICCRK

>Gga\_EDGH

MCFWLRKIFQFLRGRC SRQNRGYSNDI SSSHYGGR LRLQGRGSFF CSGEGS I IY SRGAA TYS PY SVTAGCTP GSDGVVVISG  
GDNEGASGWSTMGGTVF TYS PRGAAGY GSEDAGWGMV GGSAGGGSGCY SSKLVGRGSGYGDAP QRQKAVTT SAG QGLYGG  
ASGYGTGGELSSGGAGMAQVMQOKCF VVIIE DIE PQQIK QSSQWPE SQKK

>Gga\_EDKM

MSRLIKAITDMMDGSARRGKKSEFSRSEFKKLIQQEFADVKRSSTSKYHYIGSPLDSDTEPMNKKERGSSKTCVY

>Gga\_EDMPN1

MPNNGGCGCCGGNGNNXYTVCCYSSPRCKTPCCYPSQYCCPTCCMPMTCCYTLLSSNSNNSGCCGCGN

>Gga\_EDMPN2

MPNNGCGGGSNCTVCCYSSKSKTFCCKTQSCCPSQCCYPSQCCCF SQCCCP SQCCAMPCCMPMTCCYTLLSSNSNNSGCCGCGN

>Gga\_EDMTF1

MTFCYQNWEDSCYSFC SYRTCDWGSWGS PCGYRSYGWGS PCGYRGSWWL SGCRDWCF SYSSRWYS FWSTRCTRRYSVSSCSP  
CSSW

>Gga\_EDMTF2

MTFCYQNWEDSCYSFC SYRTCDWGSWGS PWGYRSYGWGS PCGYRGSWWL SGCRDWCF SYSSRWYS FWSTRCTRRYSVSSCSP  
CSSW

>Gga\_EDMTF3

MTFCYQNWEDSCYSFC SYRTCDWRSWGS PCGFRGSWWL SGCRDWCF SSSSRWYS FWSTRCTYTRYSVSSCSPCSSW

>Gga\_EDMTF4

MTFLHDDCYFPHSYRGLHYSSPFNYRGF GGLYDFWDRYGHDLGLYGHWF GSSRDHYFGGLNSGHRWLYGDWYGYPSWYSSRH  
GHHFGSRYGQRYGYWGW

>Gga\_EDMTFH

MTFHREFYNDHEYSPFCQEDLHGLWGLNDHRFKHLYGLHRDHHHDYNQHWSPYGYNRSFGSLYGNRSLSSHGGYYGHGDFFGF  
GHRHLYFSQFGHRYWY

>Gga\_EDNC

MSEPCCLPPPAVGTSPVTDLCTSCSVTVHSDTCTQDPCPCPEQTF GVDLCQAAF SCPDVCGPACPPP TVPAPGDIODP  
CTSQCVTSCVCPAADLQQCAETSTSLQSTS PAAPCAPETVGMCM EAFPHQHAAS PCTPETDEIYVETILVQHPPPLSTKLCTP  
EAAGPCVETCP SQHGIAEALCILETTTGTCTMETSPQHSESLCTIEVLEACTETPTTICMEDPSCPAASTPHPEQCPLPCT  
DPCVTQTSVCTEPCSSAATQGPSSASSERAPFRNLNRTAAIVERCLARCQSWLRGTK

>Gga\_EDPE

MQCKQEVTLPPGLKTI SKONQEP EPCPEPVPCQHQE EAQVAEVIAAVVVQYPEETEFLPAPSVEPCGGEAPAVVIPECPP  
QEQQQQQSKLPPTLPPVSQPEPVA CSQEK SACKELPEFLAVCP EAVPQQQOECKEIVQVPVISP EAPKCPQEKQEHKEIPV  
PVPVQNPPEVPCPQEKQEKKEVPEVPEVQEP EAPCPQEKQEKKEIVVVPVQNPPEAPCPQEKQEKKEVPEVTPCAEKQEC  
KEIVVVPVQNPPEVPCPQEKQEKKEVPEVPEVQEP EAPCPQEKQEKKEVPEVPEVQEP EAPCPQEKQEKKEVPEVTPCAEKQEC

>Gga\_EDQCM

MSYEQCKQCLPPPICLQKCSQSV EPCSNICVKPCPTQCV EVCQNP CAS ECTTCCSTQCV EPCSTQCS TQCVTQCV EPCSTQ  
CVTQCV EPCSTQCS TQCV EPCSTQCS TQCV TQCV EPCSTQCGTQCV TQCV EPCSTQCTQCV DVC PPTCVDACIKPCATQCT  
QCPVPCVEQCS TQCS TKCVEPCPAPCVEVCTKKCVDTCETVCLEPCGTVCTRPC

>Gga\_EDQM1

MCSRQDRDQCHSQERYTRQSSGCHSSGGGGCHSSGGGGGCHSSGGGSGGCHSSGGGGGCHSSGSSGGCHSSSGGGGCHSSGGG  
SCHGKQVQYHYHHQQQQQQQQQQQQQQVHQLPSQKMK

>Gga\_EDQM2

MCSRQDRDQCHSQERYTRQSSGCHSSGGGGCHSSGGGGGCHSSGGGSGGCHSSGGGGGCHSSGSSGGCHSSSGGGGCHSSGG  
SSCHGKQVQYHYHHQQQQQQQQQQQQVHQLPSQKMK

>Gga\_EDQM3

MCSRADRGCHSSSSSCHSGSSCHGSEEVTCHEVSAVQDGTPEVVVLQPCPVVTVPTQGPVAVVPCQQQQQIQKQVQWPTQ  
QOK

>Gga\_EDQrep

MLCYQQQCFPLHQBHEIPIKCPQTHLMHSWQSELCTPQYVTPCVPRQRFLSSSFSPQQCVTQCI PRQYATKCVQQQCVTQ  
HIPPARCVTTCPVQQSCAAQMSQEPVTKCMPQQQCATKCISSQQCATKCI PQQQCAARCVTTCPQQPFLTKGIRQQHSAT  
VCIPQHCVTTYAPHEQCATRVCVTPQQRATRCVSQRVYTACAPQQCANKSIPQQQCATKCI PQQQCATRCVTTCPVQFCE  
TKGTSICVPPQQQCATKCI PQQQCVTKCVPPQQCATKCI PQQQCATKCI PQQQCATKCI PQQQCATKCI PQQQCAKCI PQQQCVT  
KCI PQQQCVTKCI PQQQCVTKCAPQQQCTKCI PQQQCATKCVPPQQCATKCI PQQQCVTKCI PQQQCATKCAPQQCATKCI PQQ  
QQCATKCVPPQQCATKGIPOHQCATKGILOQQQCVTKCVPPQSVTQCVPPQYQSGGVKISSHAKKYCSASKWFW

>Gga\_EDSC

MC SRQDKDQCHRQERSSSHSSSECGGGRGGSGCHGSSSGSMCHSSSGGFCHRSSSGSGCHGSSSGSGCHGSSSGSGCHGSSSGSGC  
HGSSSGSGCHGKFPQDCQQQIYQVSSKMK

>Gga\_EDWM

MIYSSGRESYFNLNSTWYDPAWSLDRTRTPFRYGYNNCCSSRCDEGEGVEMRGHNYRHYGYRQPVCSERCQGYSTAESCHGG  
GGSSCARRPTYSYGSTGGCQGYGRSVCSERCQSSSGSCHGGGGSSCVRRTYSYGSTGGCQGYGRSVCSERCQSSSGSCHGGG  
GSSCVRRTYSYGSTGGCQGYGRSVCSERC LGSSSGGCHSSGQQPQCSEFVQYIPQCCPMVQVQVPTAKCIPHQQQQQQV  
CKVARKIK

>Gga\_EDYM1

MSYWYQYKQQCFIPSGAKHITPAFTQCHSPGVVKSVPASCASRDAKQCTTRRIVQSIKCPMPCTSSCVEKHVVEGHSSSCS  
HRSADGCTMMFSQPHGQHLMPHCRQVGVTERPQVCAEVHVGQHSSTYCSYQWSDSYHYRCGQS

>Gga\_EDYM2

MHYGGERYKQLYLPSSSYVTESHQHTSQPDACSTTCHL SIIKSMRWRQSYVQPFYVCSQPSVTHSTLLPCQPCVQQCVV  
LCPDFCETTCLLPCRKPSVRLSPAQFLQSCENGHLEKRVAKSLPPCAPRCPEPGKLFPPCGIRYSSCKDECRSKKVSRC  
SQRYGAE NRCLQGMTSGYSLELRGVTECFPQQCVTQCFMEEYISFFHQKCSKGYPTQECITTCQQQVPCPPGSGVKSSS  
QQHLAKCSLLQEGAKHKSSSAQHISKSKCLHPCAVQRSPRHHAEDVKRSSHSKSRCSKWLW

>Gga\_LOR1

MGS HQKGEQQGISSEQSGGCHGGSSGGSSCHGGGGGGSSCHSSGGGSGSYQSSQSSCHGGSSSGGGGAIYQTHISSSSFGGGG  
GGGGSSGHQGEPIICIIIGGGSSGGGGSSSHQSQGEPIICIGGGGGGGGGSDHQSQGEPIICIGGGGGGGGGSSGHQSKIPIICISG  
GGGKGEGGSSHQGGEPIICIGGGGGGGGGSSHQGGEPIICIGGGGGGGGGSSHQGGEPIICIGGGGGGGGGSSHQGGEPIICIGGGGGGGGGSS  
IICIGGGGGGGGGSSGHQSGEPIICIGGGGGGGGGSSGHQGGEPIICIGGGGGGGGGSSGHQSGEPIICIGGGGGGGGGSSGHQSGEPIICIGGGGGGGGGSS  
HQGGEPIICISGGGGGGGGSSHQSGEPIICIGGGGGGGGGSSGHQSGEPIICIGGGGGGGGGSSGYQGEPIICIGGGGGGGGGSS  
GSGHQSGEPIICIGGGGGGGGGSSGYQGEPIICIGGGGGGGSSHQSGEPIICIGGGGGGGGGSSGYQSGEPIICIGGGGGGGGGSS  
SGHQGSSICIIIGGGSSGGSSSGSGMSMOOQTQPISWPPQTKHK

>Gga\_LOR2

MC SRQSSGGCHESSQSGGCCSGSSSSSYQAQSSCCGGSSGYSMGGYSGGSSGSKIIISSGGGGSSGCGGGSSSGG  
SSGKIIIGGGSSGGSSGCCSGSSSYGMGGYSGGYSGSKSIIGGGSSGGSSGCCGGSSSGSSGKIIITGGSSGGSS  
SGCCSGSSSYGIGGGYSSGGYSGSKSIIGGGSSGGSSGCCGGSSSGSSGKIIITGGSSGGSSGCCSGSSSYGIGGG  
YSSGGYSGSKSIIGGGSSGGSSGCCGGSSSGSSGKIIITGGSSGGSSGCCSGSSSYGIGGGYSSGGYSGSKSIIGGG  
GSSGGSSGCCSGSSSYGIGGGYSSGGYSGSKSIIGGGSSGGSSGCCGGSSSGSSGKIIITGGSSGGSSGCCSGSSSYG  
MGGSSSGYSGSKSIIGGGSSGGSSGCCGGSSSYGSSSYGSSSYGSSGSKIIISSGGGGSSGCGGGSSSGSSGKII  
IIGGGSSGGSSGCCGGSSSGSSGHTIIISSGGSSGYQSSQKCPIVIPIHIESHOTKQACYFPGQOK

>Gga\_LOR3

MC SRQSSGGCHESSQSGGCCSGSSSSSYQAQSSCCGGSSGYSMGGYSGGSSGSKIIISSGGGGSSGCGGGSSSGG  
SSGKIIIGGGSSGGSSGCCSGSSSYGIGGGYSSGGYSGSKSIIGGGSSGGSSGCCGGSSSGSSGKIIITGGSSGG  
SSGCCSGSSSYGGYSSSSGSKSIIGGGSSGGSSGCCSGSSSYGTSGYSSRYGSSGSKIIISSGGGGSSGCGGG  
SSSGSSGKIIITGGSSGGSSGCCSGSSSAYGIGGGYSSGGYSGSKSIIGGGSSGGSSGCCGGSSSGSSGKIIITGG  
GSSGGSSGCCSGSSSYGIGGGYSSGGYSGSKSIIGGGSSGGSSGFCGGSSSGYSKIIITGGSSGGSSGCCSGSS  
YGMGGYSGGYSGSKSIIGGGSSGGSSGCCGGSSSGSSGKIIITGGSSGGSSGCCSGSSSYGMGGSSSGYSGSKSI  
GGSSSGSSGCCGGSSSYGSSSYGSSGSGKIIISSGGGGSSGCGGGSSSGSSGKIIIVGGSSSGSSGCCG  
GSSGGSSGGSSGHTIIISSGGSSGYQSSQKCPIVIPIHIESHOTKQACYFPGQOK

C

>Hsa\_CRCT1

MSSQSAVSAKGFSSKSSQGPAPCPAFAFTDAPASSSSCCGSGRGCDDSGCCGSSSTSCCCFPRRRRRQRSSGCCCCGGGSQ  
RSQRSNNRSSGCCSGC

>Hsa\_IVL

MSQQHTLPTVLSALSOELLKTVPPVNTHQEQMKQETLPPPCQKVEVELPVEVPSKQEEKHMTAVKGLPEQECQQQKEHQ  
EQELQQQHWEQHEEYQKAENPEQQLKQEKTRDQQLNKQLEEEKLLDQQLDQELVKRDEQLGMKKEQLLELPEQQEGHLKHL  
EQQEGQLKHPEQQEGQLELPEQQEGQLELPEQQEGQLELPEQQEGQLELPEQQEGQLELPEQQEGQLELPEQQEGQLELSEQQ  
EGQLELSEQQEGQLKHLEHQEGQLEVEEQMGQLKYLEQQEGQLKHLHQEKQPELPEQQMGQLKHLEQQEGQPKHLEQQEGQ  
LEQLEEQEGQLKHLEQQEGQLEHLEHQEGQLGLPEQQVLQKQLEKQQGQPKHLEEEEGQLKHLVQQEGQLKHLVQQEGQLEQ  
QERQVEHLEQQVGLKHLEEQEGQLKHLEQQQGLEVEQQVGGPKNLEQEEKQLELPEQQEGQVGHLEKQEAQLELPEQQV  
QPKHLEQQEKHLEHQEQDQGLKHLEQQEGQLKDLEQQGQLEQVFAFAAGOVQDIOALPTKGEVLLVEHQQQQKEVQW  
PKHK

>Hsa\_KPRP

MCDQQIQCRPLQCCVKGPSFSSQSPFAQSQVVVQALCEMQIVDCASCPVQVCQVSDQAPCQSQTQVKCQSKTKQVKG  
QAQCQSKTQVKGQAASQSQTSVVSQAPCQSEVSYVQCEASQPVQTCFVECAPVCYTETCYVECPVQNYVCPAPQPVQMYR  
GREAVCQPGRFSTQCYQGSYSSCGPQFQSRATCNYTQFQLRPSYSSCFQYRRTSFSFCVQCQTQGSYGSFTEQHR  
RSTSRCLPPRRLLQLFERSCSPPRRFEPSSSYLPLRSEGFPNYCTPERRSEPIYNSRCERRPISSCQRRGPKCRIEISSP  
CCPQVPPQRCPEIPIRRRSQSCGFPQSWGASCPELRPHVEPRPLSFCPPRRLDQCFESPLQRCPPAPRRPLRPEFCIS  
LEPRRPLRQLSEPCLYDEPLALRTPRFVFLRRGCEIPEPRCLQCEHPEPCREPIPLFAFCSPDEPCRETWRSP  
SFCWGENVPYFGDLGCHESSEPHRLDTEAPYCGSSSYNGQESGAGCGFDVFPERRGQDGHGDQGNAFAGVKGAEKSA  
YF

>Hsa\_LCE1A

MSCQSSQQQCQPPPCKTFKCPPKCTPKCPPKCPPKCPVSSCCSVSSGGCCGSSSSGGCCSSGGGGCCLSHHRRRHS  
SHRRLQSSGCCSQPSGGSSCCGGDSGQHSGGCC

>Hsa\_LCE1B

MSCQSNQQQCQPPPCKTFKCPPKCLTRCPPKCPPKCPVSSCCSVSSGGCCGSSSSGGCCGSSSSGGCCSSGGGGCCL  
SHHRRRSHCHRFPSSGCCSQPSGGSSCCGGGSGQHSGGCC

>Hsa\_LCE1C

MSCQSSQQQCQPPPCKTFKCPPKCTPKCPPKCPPKCPVSSCCSVSSGGCCGSSSSGGCCGSSSSGGCCSSGGGGCCL  
SHHRRRSHCHRFPSSGCCSQPSGGSSCCGGGSGQHSGGCC

>Hsa\_LCE1D

MSCQSSQQQCQPPPCKTFKCTPKCFAPKCPPKCPVSSCCSVSSGGCCGSSSSGGCCGSSSSGGCCSSGGGGCCL  
SHHRRRSHRRFPSSDCCSQPSGGSSCCGGGSSQHSGGCC

>Hsa\_LCE1E

MSCQSSQQQCQPPPCKTFKCPPKCTPKCPPKCPPKCPVSSCCSVSSGGCCGSSSSGGCCGSSSSGGCCSSGGGGCCL  
SHHRRRSHHRRFPSSDCCSQPSGGSSCCGGGSGQHSGGCC

>Hsa\_LCE1F

MSCQSSQQQCQPPPCKTFKCPPKCTPKCPPKCPPKCPVSSCCSVSSGGCCGSSSSGGCCSSGGGGCCLSHHRRR  
SHHRRFPSSDCCSQPSAGSSCCGGGSGQHSGGCC

>Hsa\_LCE2A

MSCQSNQQQCQPPPCKPPKCPPKCPPKCRPQCPAPCPPVSSCCGSSGGCCGSSSSGGCCSSGGGGCCLSHHRR  
PRLFHRHRHQSPDCCCEPSSGGSGCCHSSGDCC

>Hsa\_LCE2B

MSCQSNQQQCQPPPCKPPKCTPKCPPKCPPKCLPQCFAPCSPAVSSCCGPISSGCCGSSGGCCNSGAGGCCLSHHRR  
PRLFHRRHQSPDCCCESEPSGGSGCCHSSGGCC

>Hsa\_LCE2C

MSCQSNQQQCQPPPCKPPKCTPKCPPKCPPKCPPQCFAPCFPAVSSCCGPISSGCCGSSGGCCNSGAGGCCLSHHRR  
PRLFHRRHQSPDCCCESEPSGGSGCCHSSGGCC

>Hsa\_LCE2D

MSCQSNQQQCQPPPCKPPKCTPKCPPKCPPKCPPQCFAPCSPAVSSCCGPISSGCCGSSGGCCNSGAGGCCLSHHRR  
PRLFHRRHQSPDCCCESEPSGASGCCHSSGGCC

>Hsa\_LCE3A

MSCQSNQQQCQPPPCKPAKSPAQCLPFASSCAPSSGGCGPSSERSCCLSHHRCSRSHRCRCQSSNSCDRGSQGGSSCGH  
SSAGCC

>Hsa\_LCE3B

MSCQSNQQQCQPLPKCFSPKCPPKSSAQCLPPASSCCAFRPGCCGGPSSGGCCLSHHRCCRSHRCRRQSSNSCDRGSQGG  
ASDCYGGSGCC

>Hsa\_LCE3C

MSQQNQQQCQPPPKCFSPKCPPKSAQCLPPPSSDICALSSGGCGPSSSESGCCLSHHRHFRSHQCRRRQNSNSCDRGSQQGGG  
SCRGHGSGGCC

>Hsa\_LCE3D

MSQQNQQQCQPPPKCFSPKCPPKSVQCLPPASSGCAFPSSGGCGPSSSEGGCFLNHHRHRHRQCRRRQNSNSCDRGSQQGGGSG  
CGHSGGCC

>Hsa\_LCE3E

MSQQNQKQCQPPPKCFSPKCPPKSVQCLPPASSGCAFPSSGGCGPSSSEGGCFLNHHRHRHRQCRRRQNSNSCDRGSQQGGGSG  
CCHSGGCC

>Hsa\_LCE4A

MSQQNQQQCQPPPKCFIPKYPPKCFSPKASSCPPPISSCCGSSSSGGCGCCSSEGGGCLSHHRHHRSHCHRPKSSNCYGSGS  
GQQSGGSGCCSGGCC

>Hsa\_LCE5A

MSQQSQQQCQPPPKCFIPKYPPKCFSPKASSCPPPISSCCGSSSSGGCGCCSSEGGGCLSHHRHRQSLRRRFPQ  
SSSCGSGSGQQSGGSSCCHSSGSGCCHSSGGCC

>Hsa\_LCE6A

MSQQKQQSWKPPNVFKKSPPPQRSNPLAPYSTPCGAHSEGCCHSSQRFEVQKPRRARQKLRCLSRGTTYHCKEEECEGD

>Hsa\_LELP1

MSDDKSKSNDPKTEFKNCDBKCEQKESKCKQPSCLKLLQRCFEKCFWEKCPAPPKCLFCPSQSPSSCFFPQCTKCPKCF  
SSCHACPPPCPPE

>Hsa\_LEP7

MCDQKQKQPPSCVKGSGLGAGQGSNGASVCKEVPQQTQTVCVTGEAFCPTQTYVKYQVEPCQTQTYVKCFAPCQRTYVKYFT  
PCQTYVKCFAPCQTYVKCFPCQTYVKCFAPCQMTYIKSPAPCQTYVKYQVEPCQSYVYQAPASGSGTQYCVTDPCSAFC  
STSYCCLARFTFGVSLRRWIQRFPQNTGSSGCCENSGSSGCCSGGGCGSCGCGSSGCCCLGIIEMRSRGPACCDHEDDCC  
C

>Hsa\_LOR

MSYQKKQPTPQPFVDTVKTSGGGGGGGGSGGGGCGFFGGGGSGGGSSSGCGYSGGGYSGGGCGGGSSGGGGGGGGIGGCGGG  
SGGSVKYSGGGSSGGSGCFSSGGGGSGCFSSGGGGSSGGSGCFSSGGGGSSGGSGCFSSGGGGFSGQAVQCQSYGGVSS  
GGSSGGSGCFSSGGGGSVCGYSGGGSGCGGGSSGGSSGYVSSQOVTQTSAPQPSYGGSSGGGGSGSGCFSSGGGG  
SGCGGGSSGIGSGCIISSGGSVCGGGSSGGGGSSVGGSSGKGVICHQTOQKQAPTWPSK

>Hsa\_PRR9

MSFSQQKQPCVPPPCLPKTKQEQCAKAEVCLPTCQHPQCDKCLVQAQEVCLSQCESSQEKCPQGGQEFYLPQCQDQCFP  
QCAEPCQELFQTKCQVEVCPQKVQEKCSSPGKSK

>Hsa\_SMCP

MCDQTKHSKCCPAKGNQCCPPQONQCCQSKGNQCCPPKQONCCQPKGSQCCPPKHNCQPKPPCCIQARCCGLETKEEVSFL  
NMESEFNSTPQTQDKGCQTQQQPHSQNESTRPSK

>Hsa\_SPRR1A

MNSQQKQKQPCPPPPQQQQVQKQPCQPPQPCIPKTKEPCHPKVPECHPKVPEPCQPKVPEPCQPKVPEPCPSIVTAPAAQ  
QTKQK

>Hsa\_SPRR1B

MSQQKQKQPCPPPPQQQQVQKQPCQPPQPCIPKTKEPCHPKVPECHPKVPEPCQPKVPEPCQPKVPEPCPSIVTAPAAQ  
QTKQK

>Hsa\_SPRR2A

MSYQQQCKQPCQPPPVCPKCFEPCPPPKCFEPCPPPKCFQPCPPQCCQKYPPVTSPPCQSKYPPKSK

>Hsa\_SPRR2B

MSYQQQCKQPCQPPPVCPKCFEPCPPPKCFEPCPPPKCFQPCPPQCCQKYPPVTSPPCQPKYPPKSK

>Hsa\_SPRR2D

MSYQQQCKQPCQPPPVCPKCFEPCPPPKCFEPCSPKCFQPCPPQCCQKYPPVTSPPCQPKCFPKSK

>Hsa\_SPRR2E

MSYQQQCKQPCQPPPVCPKCFEPCPPPKCFEPCPPPKCFQPCPPQCCQKCPVTSPPCQPKCFPKSK

```

>Hsa_SPRR2F
MSYQQQQCKQPCQPPVCPAPKCPEPCPPPCKPEPCPEPKCQSCPPQQCQKCPPVTFSPPCQPKCEPKSK

>Hsa_SPRR2G
MSYQQQQCKQPCQPPVCPPTPKCPEPCPPPCKPEPYLPPPCPEHCPPPCQDKPEVQFYPPCQOKYPEKSK

>Hsa_SPRR3
MSSYQQKQTFTPPQLQQQVKQPSQPPPQEIVPTTKPECHSKVQEGNTKIDPEGCTKVPPEGCTKVEEFGCTKVPEEGCT
KVPEEGCTKVPEEGCTKVPEEGYTKVEEGSIKVPDQGFVKFPEPGAIVPEEGYTKVEEGYTKLPEEGCTSTVTGGPAQQKT
KQK

>Hsa_SPRR4
MSSQQQQRQQQQCPPQRAQQQVQPCQPPVCKQETCAPKTKDPCAPQVKKQCPKGTIIIPAAQKCPASQAASKSKQK

```

**Suppl. Fig. S1.** Amino acid sequences of SEDC and EDKM proteins of green anole lizard (A), chicken (B), and human (C). Amino acid sequences were deduced from cDNA and genomic sequences determined in this study and from the genome sequences available in the GenBank. Details about coding sequences are provided in Suppl. Table S1. Amino acid residues are color-coded in line with Fig. 3. Aca, *Anolis carolinensis*; Gga, *Gallus gallus*; Hsa, *Homo sapiens*.





```

Hsa_LOR  MSYQKQEPTEPPEVD-----CVKTSGGGG-----GGGSSGGGGG
Gga_LOR1  MGSHQKGGEGQGISEQSGGCHGGSSGSSCHGGGGGSSCHSSGG-----GGSIGY-QSQGSSC---HGGSSGGGGGAI
Gga_LOR2  MCS--RQSS--GGCHESSSQSGG-----CCSGSSSSSYQAQSSCC-----GSSSGY-SM-----GGGYSGSSGGS
Gga_LOR3  MCS--RQSS--GGCHESSSQSGG-----CCSGSSSSSYQAQSSCC-----GSSSGY-SM-----GGGYSGSSGGS
Aca_LOR1  MGSQQRQSS--GCCGRGGGGGGGGGGSSCCGRRSGSSSSSSSSSSCCSSSRSSGQ-QSQGSMCCGGGGGGGGGGGGSSG
Aca_LOR2  MS-QQRQSGCCGSNRSRCGRRSGSSGSSCCGGSSGGGSSCGRRSGSSGCGGSSVGLAQVSGSSCGRRSGSSCCGGS

Hsa_LOR  -----FFGGGSSGGSSGSC-----G
Gga_LOR1  YQTHISSSSFFGGGGG-----GGSSGHQGGEPICIIIGGGSSGGGGSSHQSGEPICIGG-----GGG
Gga_LOR2  SQKIIISGGGGGGSSGCC-----GGSSSSGSSGKIIIGGGSSGGSSGCCSGSSSYGMGGGYSS-----GG
Gga_LOR3  SQKIIISGGGGGGSSGCC-----GGSSSSGSSGKIIIGGGSSGGSSGCCSGSSSYGMGGGYSS-----GG
Aca_LOR1  GQKIIIVSSGGSSGGCCCGGGGGGGGGSSGGSGQIIISGGSSGGQSSSCGGSSGGSSGGGMOQKIICCGGGGGG
Aca_LOR2  S---VGIAQVSGGYGSC-----SSGGSSGQGVVIVSGGQSSCGSSGGIQQIRSGCGSSG-----G

Hsa_LOR  YSGGGYSGGCGGGSSGGGGGGIGG-----CGGSSGSSVKYSGGGSSG-----G
Gga_LOR1  GGGSDHQSGCHICIGGGGGGGGGSGH-----QSKIETISGGGGK-GEGSSHQGCHICIGGG-----G
Gga_LOR2  YSGKSIIGGG-SSGGSSGCCGGSSSSGG-----SSGKIIITGGSSG-GSSGCCSGSS--GYGIG-----G
Gga_LOR3  YSGKSIIGGGSSGGSSGCCGGSSSSGG-----SSGKIIITGGSSG-GSSGCCSGSSYGGYSSSSSGSKSIIG
Aca_LOR1  GSGGKIIGGGSSGGGGGGGGGGSGGMKSMGGSSGGSSGCGMGGSSGG-GGSSGGGGGGGGVKKIIGGGSSGGGGGG
Aca_LOR2  SSGGAVIIAAGVGGQSSGCCVGGYGSGM-----GQOKIIVIDSGFSGGIGCGGSSGGGLGQSIIVV-----G

Hsa_LOR  -GGSG-----FSSGGGGSCGFSSGGGGSS-----G
Gga_LOR1  GGGGGSSHQGGG-----ICIGGGGGGG-----GGSS-----HQGGEPICIG
Gga_LOR2  GYSGGYS--GSKS-----IIGGGSSGGSSGCCGGSSSG-----GSSGKIIIT
Gga_LOR3  GSSSSGSS--GCCSGSSSYGTSYGSRRYSGSSGQKIIISGGGGGGSSGCCGGSSSG-----GSSGKIIIT
Aca_LOR1  GGGSSGMSMGGSSGSSCGMGGSSGGGGGGGGSSGGIKIIGGGSSGGGGGGGGGGSSGMSMGGSSGSSCGM
Aca_LOR2  SGGSG-----CYGGQVISSGSSASGCCSG-----DAGVGGVKVI

Hsa_LOR  GGGSCFSSGGGGSSGGSSGCFSSGGGFSGQAVQCSYGGVSSGGSSGG-----SGCFSSG-----G
Gga_LOR1  GGGGGKGGEGSSHQGGEPICIGGGGGGGGGSSHQGGEPICISGGGGGG-----GGSSHQGGEPICIGGGG
Gga_LOR2  GGGSSSGSC--CGSSSYGIGGGYSGGYSGSKSIIGGGSSG-----GGSSSG-----CCGGSSSGSSGKIIIT--IT
Gga_LOR3  GGGSSSGSSC--CGSSSYGIGGGYSGGYSGSKSIIGGGSSG-----GGSSSG-----CCGGSSSGSSGKIIIT--IT
Aca_LOR1  GGGSSGGGGSGVKKIIGGGSSSGGGGGGGGGSSGMSMGGSSGGSSGGSSGKTIICGGSSGGQSSGQSSGQSS
Aca_LOR2  GGGSGRVSEVCGGVSGGVKVIIGSSGRVSEVCGGVSGGVKVIIGSSGRV-----SEVYGGASCGGVKVI--IG

Hsa_LOR  GGGGSVCGYSGGGSGCGGGSSGSSGSGYVSSQVTTQTSAPQPSYGGSS-----G
Gga_LOR1  GGGSGHQSGCHICIGGSSIGGGGGGGSSHQGGEPICISGGGGGG-----G
Gga_LOR2  GGGSSG-SSG-CC-SGSSSYGIGGGYSGGYSGSKSIIGGGSSGSSG-----G
Gga_LOR3  GGGSSG-SSG-CC-SGSSSYGIGGGYSGGYSGSKSIIGGGSSGSSGFCGGSSSGGYSEKIIITGGSSSGSSG
Aca_LOR1  GQSSGQSSG-CCMGGSSSGGGGGQTIIVFCGSSSGSQSSGQSSSCMGGSSSGGGGGGGGGGGGGQNSGHQT
Aca_LOR2  GGSGRVSEVYGGASCGGVKVIIGSSGRVSEVYGGASCGGVKVIIGSSGR-----GSIYGGVSGGVKVI--IG

Hsa_LOR  -----GGGSSG-----SGCFSSG
Gga_LOR1  -----GGSSHQSGG-----PICIGGGGG-----GGSSHQSGGEPICIG-----GGGGGG
Gga_LOR2  C--CGSSSYGIGGGY-SSGGYSGSKSIIGGGSSG-----SSGCC-GGGSSSGSSGKIIIT-----TGGSSG
Gga_LOR3  C--CGSSSYGIMGGY-SSGGYSGSKSIIGGGSSG-----SSGCC-GGGSSSGSSGKIIIT-----TGGSSG
Aca_LOR1  IIVSCGSSGGGGRRRRSSGQSSSCMGGSSGGGGGGSSGCGMGGSSGGGGGGGGGGGGGGQNSGHQT
Aca_LOR2  VSEVYGGVSGGV-----KVIIGSSG-----GSIYGGVSGGVKVI-----IGGGSSG

Hsa_LOR  -----GGSSCGGGSSGIGSCII-----SGGSSVCGGSSG-----G
Gga_LOR1  GSGYQGGEPICIGGGGGGGGGSSHQGGEPICIGGGGG-----GGSSYQGGEPICIGGGGGSSHQGGEPICIGGG-
Gga_LOR2  -SSGCCSGSSSYGMGGSSGGYSGSKSIIG--GGSSSGSGCGGGSSGYGSSY-----GSSSYSGSSGQKIIISG-
Gga_LOR3  -SSGCCSGSSSYGMGGSSGGYSGSKSIIG--GGSSSGSGCGGGSSGYGSSY-----GSSYSGSSGQKIIISG-
Aca_LOR1  QSSSCMGGSSSGGGGGGGQNSGHQTIIVSCGSSSGGGQSSGQSSGQSSGCCMGGSSSGGGGGGGGGGGGGQNSGHQ
Aca_LOR2  ---SITCGGLSDGGVKVVGSSGRISVYVYGGVSGGVKVVGGSSG-----GSIYGGVSGGVKVIIGGG-

Hsa_LOR  -----GGGSS-----VGGSSGCKG-----G
Gga_LOR1  --GGGGGGGYQSGEPICIGGGGGGGGGSSHQGGEPICIGGGGGGGSS-----SGMSMQQQTQCHI
Gga_LOR2  -GGGSSGCCGGSSSSGSSGKIIIGGGSSGGSSC--CGGSSGGSSG--HTIIISGGSSGGYQSSQKCHI
Gga_LOR3  -GGGSSGCCGGSSSSGSSGKIIIVGGSSGGSSC--CGGSSGGSSG--HTIIISGGSSGGYQSSQKCHI
Aca_LOR1  SGGGGGQSSGQSSSCMGGSSSGGGGGGGQTIIVFCGSSSGGGGGSSGQSSGCCSGGGSSGSSMSKQSF
Aca_LOR2  --SGRVSEVCGGSS-----GQTIIVVSGSSG-----CGGASSTVVG-----GGSSQVKVIL

Hsa_LOR  -VEICHQTQKQAEWES---K
Gga_LOR1  -----SWFPQTKHK
Gga_LOR2  VIPHIESHOTKQACYFEGQ--K
Gga_LOR3  VIPHIESHOTKQACYFEGQ--K
Aca_LOR1  SIPACLS-QTKQMTWESGQ--K
Aca_LOR2  VVECLIG-QTKQVTSLEPSC--K

```

**Suppl. Fig. S3. Amino acid sequence alignment of lorocrin orthologs of human, chicken and lizard.** Amino acid residues are highlighted by colors as in Figure 3. Hsa, *Homo sapiens*; Gga, *Gallus gallus*; Aca, *Anolis carolinensis*.

```

Aca_S100A11 MFKRSSRYTAGPSETERCIESLLAVFHKYAKGDRDANTLSKKEFKRFMNTELASLTKNQKDPPIVDRIGKKIDMNDGNIDFEEFLNLVG
Hsa_S100A11 -----MAKISSPTETERCIESLIAVFQKYAGKDGNYNTLSKTEFLSFMNTELAFTKNQKDPGVLDRMMKKLDTNSDGQLDFSEFLNLIG
Gga_S100A11 -----MSKVS-PTETERCIESLLAVFQRYAGREGDNLKLSKKEFRTFMNTELASFTKNQKDPVAVDRMMKRLDINS DGQLDFQEFLNLIG
Hsa_S100A4 -----MACPLEKALDVMVSTFHKYSGKEGDKFKLNKSELEKELLTRELPSPFLGKRTDEAAFQKLSNLDSDNRDNEVDFQEYCVFLS
Gga_S100A4 -----MMACPLEQALAVMVSTFHKYSGKEGDKFKLSKAELKELLSRELPAFGTKQMDEGEFRRLMNDLDHDKDSEVDFKYEACFLA
Aca_EDKM -----MSRLIRAFDTMMEGNHKSNPVKVKEAETFKKSEFKKLIQQEELSPV--QRSSSSKYKNMKNALDSDAELMTDKE---TVPC
Gga_EDKM -----MSRLIKAITDMMDGS----ARRGKSESFSRSEFKKLIQQEFAPV--KRSSTSKYHYIGSPLDSDTEPMNKKERGSSTC
Consensus .....m.....e...d.$...f...ya.k.....lksEfk.l...Ela.....r.d.....lDs#.#...dfee.....

```

```

Aca_S100A11 GIASACHSHVAASGKP-----
Hsa_S100A11 GLAMACHDSFLKAVPSQKRT-
Gga_S100A11 GIAVACHDALLVQPPHP----
Hsa_S100A4 CIAMMCNEFFEGFPDKQPRKK
Gga_S100A4 CVAMGYNEFFRDA--QRPRKK
Aca_EDKM AY-----
Gga_EDKM VY-----
Consensus ..a.....

```

**Suppl. Fig. S4. Amino acid sequence alignment of EDKM and S100A proteins.** The amino acid sequences of EDKM proteins were aligned to those of representative S100A proteins. The alignment was done with the Multalin algorithm using the following default settings. Symbol comparison table: BLOSUM62. Gap weight: 12. Gap length weight: 2. Consensus levels: high=90% (red letters), low=50% (blue letters). Consensus symbols: \$ is anyone of LM; # is anyone of NDQEBZ. Aca, *Anolis carolinensis*; Gga, *Gallus gallus*; Hsa, *Homo sapiens*.

**A**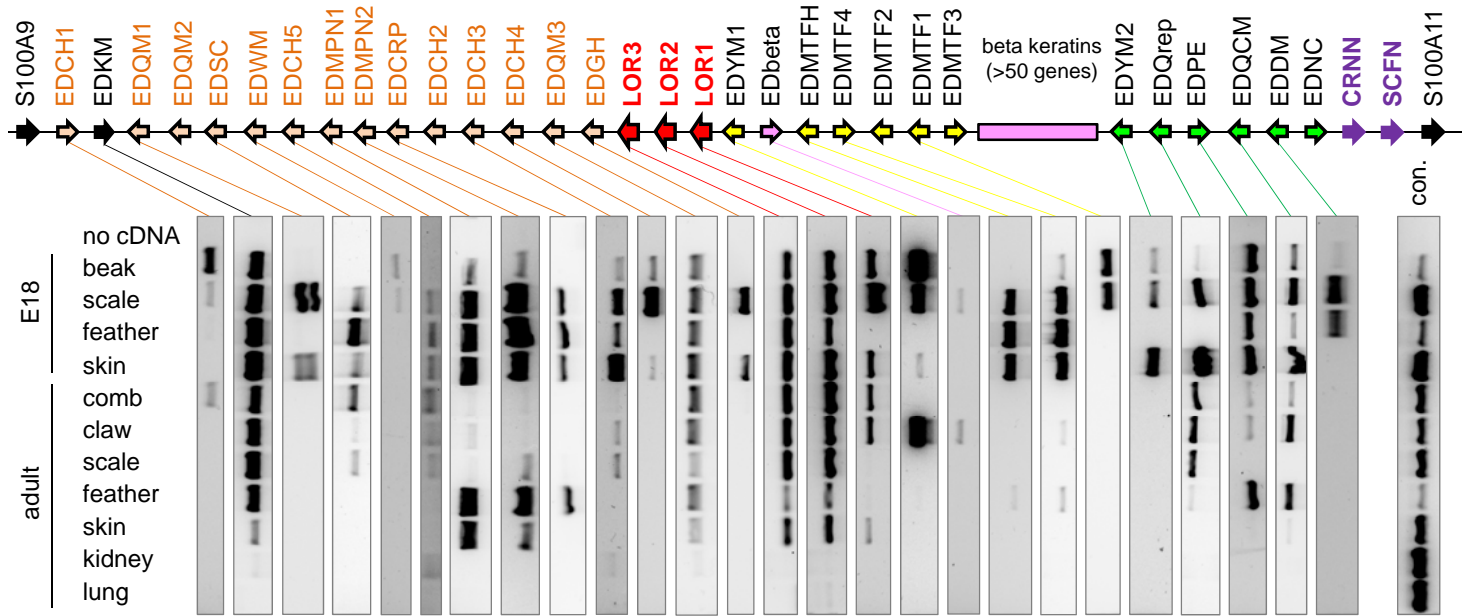**B**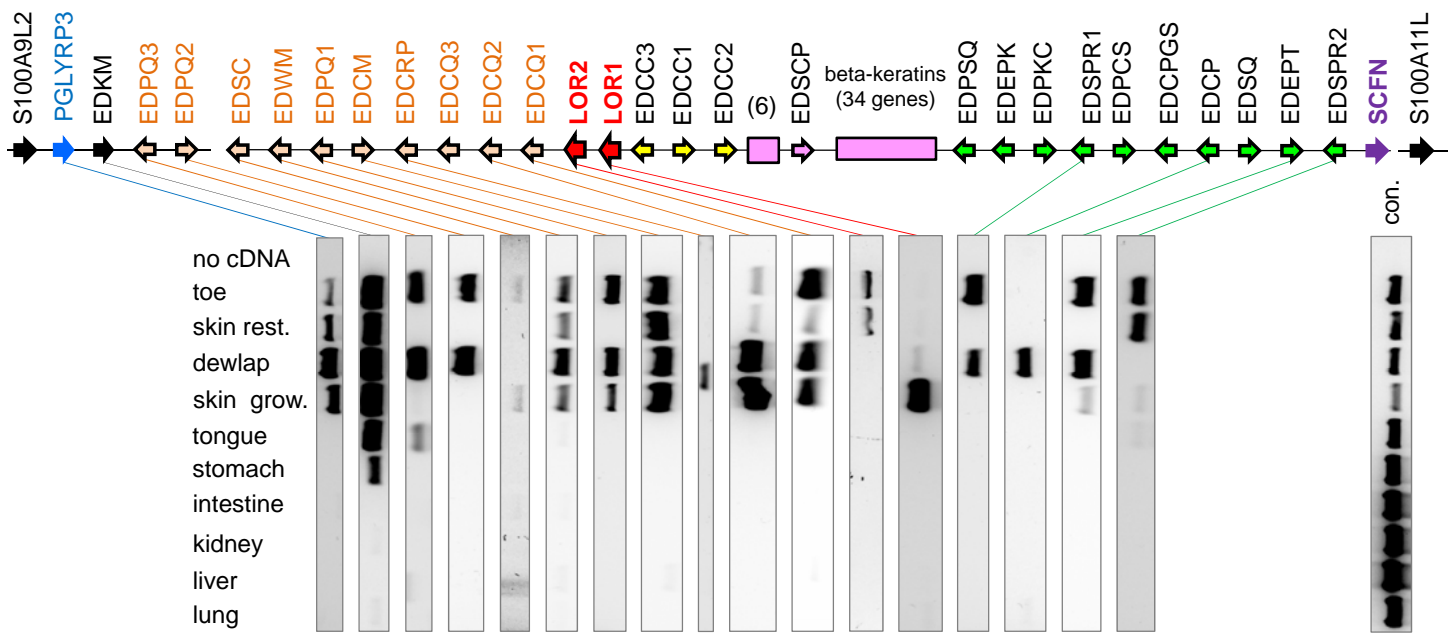

**Suppl. Fig. S5. Comparison of expression patterns of EDC genes and their positions within the EDC.** Images of RT-PCR results (Fig. 2A, B) were arranged along the EDC (Fig. 1) for (A) chicken and (B) lizard. Not for all genes the PCR amplification was done. skin rest., skin resting; skin grow., skin growing; con., control gene.

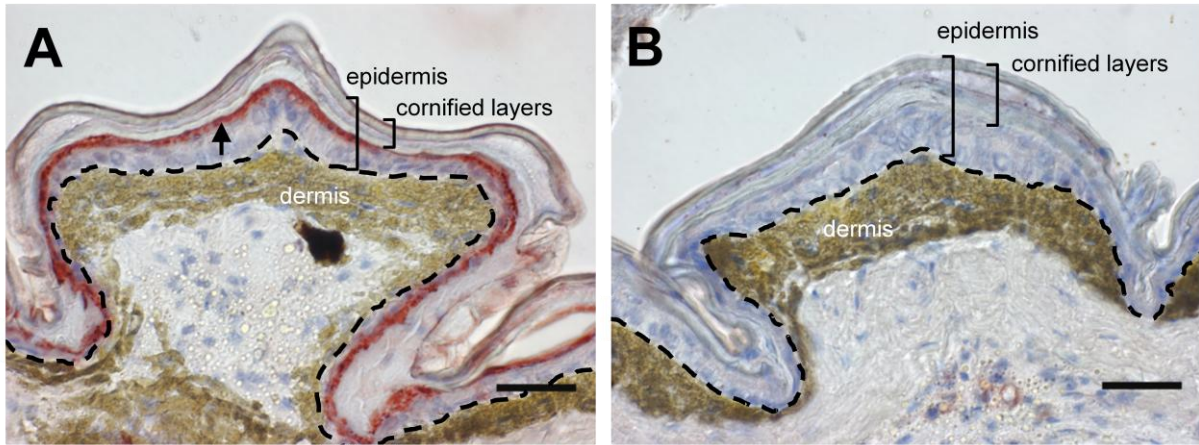

**Suppl. Fig. S6. Immunohistochemical detection of loricrin 1 in the skin of the green anole lizard.** Sections through the skin of *A. carolinensis* were immunostained with an antibody against loricrin 1 (red) (**A**). An arrow indicates the immunopositive layer of the epidermis. To confirm the specificity of the staining, the primary antibody was pre-incubated with a peptide corresponding to the epitope of the antibody, leading to the abrogation of the signal (**B**). Scale bar, 40  $\mu\text{m}$ .

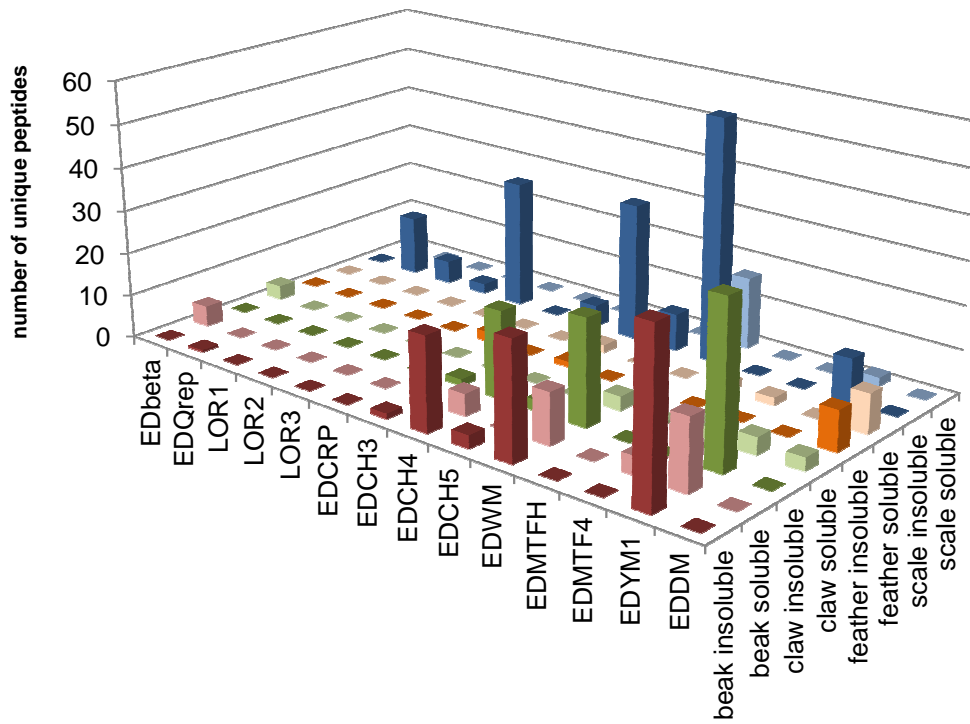

**Suppl. Fig. S7. Proteomics of chicken cornification products.** Beak (red), claw (green), feather (orange), and scale (blue) of chicken were analyzed by proteomics (Rice et al., 2013). The number of peptides corresponding to our 14 newly identified SEDC proteins are shown as bars (mean of preparations from 4 individual animals) divided into insoluble and soluble fractions. For details, see Suppl. Table S5.

**A**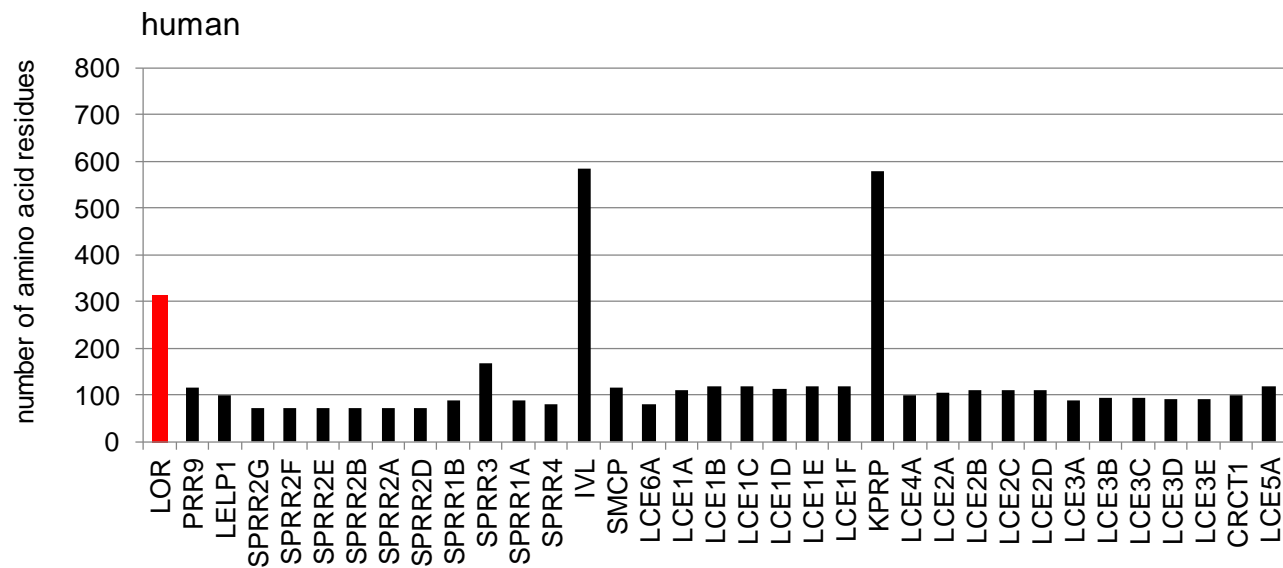**B**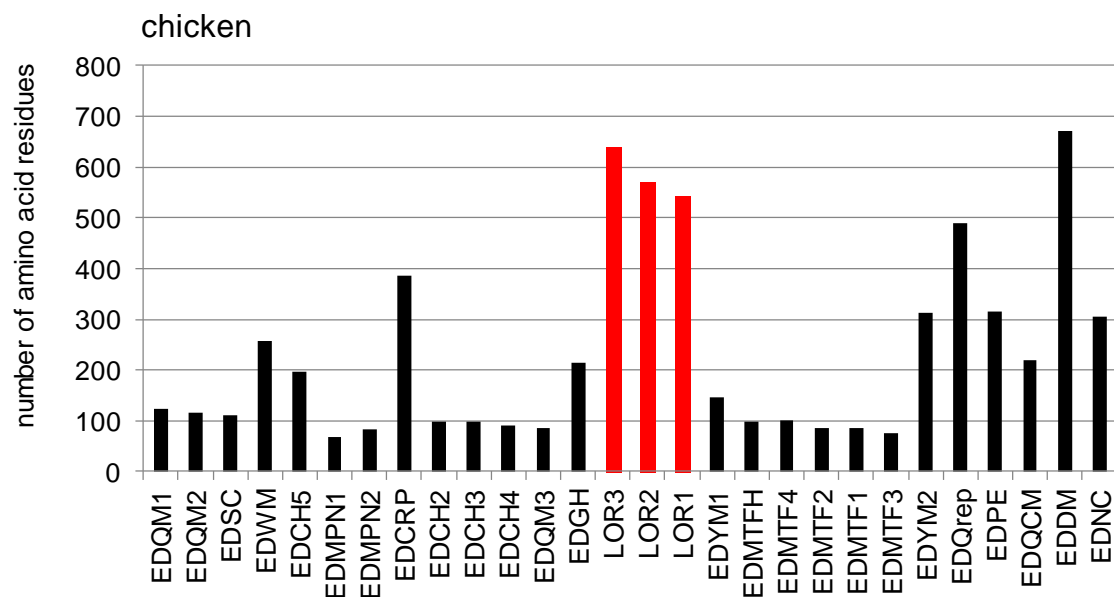**C**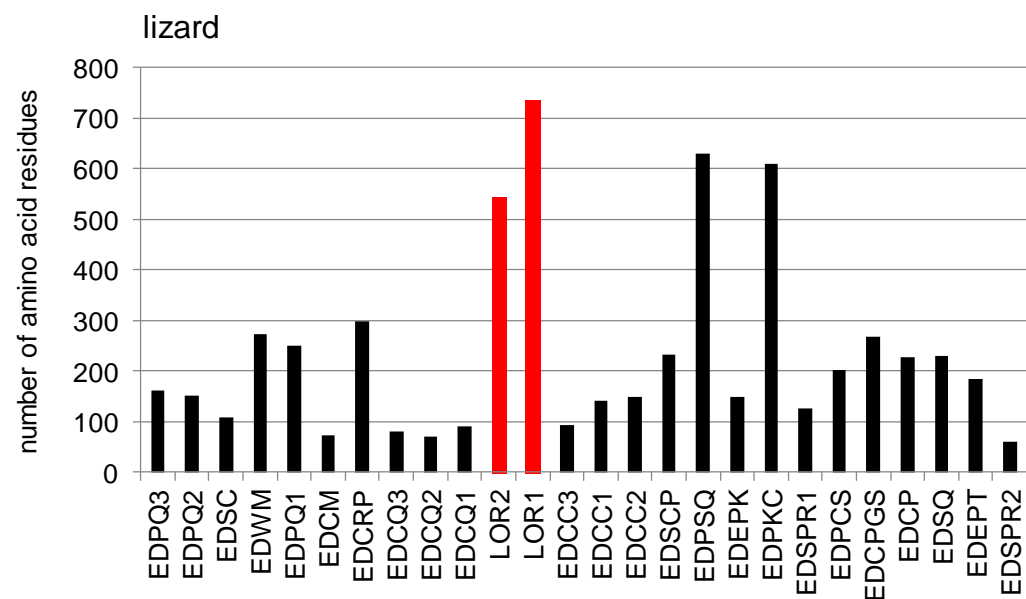

**Suppl. Fig. S8. Lengths of SEDC proteins.** The diagram shows the lengths of SEDC proteins measured as number of amino acid residues. The proteins are arranged in the order of the genes encoding them within the human (A), chicken (B) and lizard (C) EDC. Bars corresponding to loricrin orthologs are highlighted by red shading.

```

Hsa_Iv1      MSQHTLPVTLSPALSQELLKIVPPPVNTHQEMKQPTPLPPPCKKVPVELPVEVPSKQEEKHMTAVKGLPEQECFQQQKEPQEQEQLQQHWEQHEEYK
Gga_EDQrep  MLCYQQ--QCFFPLHQEHIPIKCP--QTHPLMHSWQSELCTPQYVTPQVPRQRFLLSSSFSPQQCVTQCIPRQQ--YATKCVQQQQCVTQHIPPACVTT
Gga_Iv1     -----MHSWQSELCTPQYVTPQVPRQRFLLSSSFSPQQCVTQCIPRQQ--YATKCVQQQQCVTQHIPPACVTT
              *          * * *          * **          * *          *          *          *          *          *          *          *
Hsa_Iv1      AENPEQQKQEKTORDOQLNKQLEEEKLLDQQLDQELVKKRDEQLGMKKQELLEPEQEGHLLKHEQQEGQKHPEQQEGQLELPEQQEGQLELPEQQE
Gga_EDQrep  CVPQQSCAAQGMSEPCVTKCMPQQCATKCSISQQCATKCIPOQQCAARCVTTQIPQQPFLTKGIRQQHSATVCIPOHCVTTYAPHEQCATRVTTC--
Gga_Iv1     CVPQQSCAAQGMSEPCVTKCMPQQCATKCSISQQCATKCIPOQQCAARCVTTQIPQQPFLTKGIRQQHSATVCIPOHCVTTYAPHEQCATRVTTC--
              *          *          *          *          *          *          *          *          *          *          *
Hsa_Iv1      GQLELPEQEGQLELPEQEGQLELPEQEGQLELPEQEGQLELPEQEGQLELSEQEGQLELSEQEGQLKHLEHQQEGQLEVPQEGMGLKYLEQQEGQLKHLDDQE
Gga_EDQrep  ---VPQRATRCV---SQRYVTAQAPQQCANKSIPQQQCATKCIPOQQCATRCVTTQVPO-----PCETKGTSCIQVPOQQCATKCIPOQQ
Gga_Iv1     ---VPQRATRCV---SQRYVTAQAPQQCANKSIPQQQCATKCIPOQQCATRCVTTQVPO-----PCETKGTSCIQVPOQQCATKCIPOQQ
              *          *          *          *          *          *          *          *          *          *          *
Hsa_Iv1      KQPELPEQQMGQLKHEQQEGQPKHLEQQEGQLEQLEQEGQLKHEQQEGQLEHLEHQQEGQLGLPEQQVQLQKLEKQQGQPKHLEEEEGQLKHLVQQE
Gga_EDQrep  CVTKCVPQQCAT-----KCIPOQQCATKCIPOQQCATKCIPOQQCATKCIPOQQCAKCIPOQQCVT-KCIPOQQCVTKCIPOQQCVTKCAPQQ-
Gga_Iv1     CVTKCVPQQCAT-----KCIPOQQCATKCIPOQQCATKCIPOQQCATKCIPOQQCAKCIPOQQCVT-KCIPOQQCVTKCIPOQQCVTKCAPQQ-
              **          * **          *          *          *          *          *          *          *          *          *
Hsa_Iv1      GQLHLVQQEGQLEQERQVEHLEQQVGLKHLQEGQLKHEQQEGQLEVPQEGQPKNLEQEEKQLELPEQQEGQVKKHLEKQEALELPEQQVGP
Gga_EDQrep  -----QCTKCIPOQQCATKCVPQQCAT-KCIPOQQCVTKCIPOQQCATKCAPOQQCATK-----IPQQQCATKCVPQQCATKGIPOQQHCCAT
Gga_Iv1     -----QCTKCIPOQQCATKCVPQQCAT-KCIPOQQCVTKCIPOQQCATKCAPOQQCATK-----IPQQQCATKCVPQQCATKGIPOQQHCCAT
              *          **          **          *          *          *          *          *          *          *          *
Hsa_Iv1      KHLEQQEKHLEHPEQDQGLKHLQEGQLKDLQEQGLQEPVFAPAPGVQDIQPALPTKGEVLLPVEHQQKQEVQWPPKHK
Gga_EDQrep  KGILQQQCVTKCVPQQSVTQCVPOQPYQ-----SSGVKISSHAKKYCSASKWP---W
Gga_Iv1     KGILQQQCVTKCVPQQSVTQCVPOQPYQ-----SSGVKISSHAKKYCSASKWP---W
              * **          *          *          *          *          *          *          *          *          *

```

**Suppl. Fig. S9. Amino acid sequence alignment of human involucrin (Iv1), chicken EDQrep and a previously predicted protein named chicken involucrin.** Amino acid sequences of human involucrin, chicken EDQrep and chicken involucrin as predicted by Vanhoutteghem et al. (2008) were aligned. The positions of sequence identity are marked by asterisks. Amino acid residues involved in intermolecular crosslinking via transglutamination (Q, K) and disulfide bridge formation (C) are highlighted by color shading. Note that the previous chicken involucrin prediction represents the N-terminally truncated sequence of EDQrep. This discrepancy has been caused by the fact that the cDNA, from which the putative chicken involucrin was predicted, did not comprise the complete 5'-end of the open reading frame nor any sequence derived from the non-coding exon 1. Gga, *Gallus gallus*; Hsa, *Homo sapiens*.



**A****>Gga\_EDDM**

MLCQTD<sup>C</sup>Q<sup>R</sup>GL<sup>P</sup>CL<sup>P</sup>PHVVLVRNL<sup>P</sup>  
 VSR<sup>S</sup>SVD<sup>P</sup>PC<sup>N</sup>SV<sup>C</sup>SV<sup>S</sup>R  
 LNT<sup>C</sup>AD<sup>P</sup>PC<sup>Y</sup>YARV<sup>P</sup>Q<sup>G</sup>TTTTYL<sup>K</sup>L<sup>G</sup>S<sup>C</sup>DL  
 RQIALD<sup>P</sup>CC<sup>L</sup>G  
 ITTLTD<sup>P</sup>CC<sup>Q</sup>DVTR<sup>C</sup>S  
 STR<sup>C</sup>VDP<sup>P</sup>CC<sup>C</sup>KVTE<sup>C</sup>S  
 STR<sup>Y</sup>VDS<sup>C</sup>CC<sup>Q</sup>DAT<sup>Q</sup>C  
 TTR<sup>C</sup>VDS<sup>C</sup>CC<sup>Q</sup>DAT<sup>Q</sup>C  
 TTR<sup>C</sup>VDP<sup>P</sup>CC<sup>Q</sup>DVT<sup>Q</sup>C  
 TTR<sup>C</sup>VDP<sup>P</sup>CR<sup>Q</sup>DAT<sup>Q</sup>C  
 TTR<sup>C</sup>VDP<sup>P</sup>CR<sup>Q</sup>DAT<sup>Q</sup>C  
 TTR<sup>C</sup>VDP<sup>P</sup>CC<sup>Q</sup>DVT<sup>K</sup>C  
 TTR<sup>C</sup>VDP<sup>P</sup>CR<sup>Q</sup>DTT<sup>Q</sup>C  
 TTR<sup>C</sup>VDP<sup>P</sup>CC<sup>Q</sup>DVT<sup>K</sup>C  
 TTR<sup>C</sup>ID<sup>P</sup>CR<sup>Q</sup>DTT<sup>Q</sup>C  
 TTR<sup>C</sup>VDP<sup>P</sup>CC<sup>Q</sup>DVTR<sup>C</sup>  
 TTR<sup>C</sup>VDP<sup>P</sup>CC<sup>K</sup>EVTR<sup>C</sup>  
 TTR<sup>C</sup>VDP<sup>P</sup>CC<sup>Q</sup>DVT<sup>K</sup>C  
 TTR<sup>C</sup>VDP<sup>P</sup>CC<sup>K</sup>EVTK<sup>CT</sup>  
 TTR<sup>C</sup>VDP<sup>P</sup>CC<sup>K</sup>EVTR<sup>C</sup>  
 TTR<sup>C</sup>AD<sup>P</sup>CC<sup>G</sup>EVTK<sup>C</sup>  
 TT<sup>K</sup>YVD<sup>P</sup>CC<sup>R</sup>PVTR<sup>C</sup>  
 AT<sup>T</sup>CVD<sup>P</sup>CC<sup>G</sup>RVTK<sup>C</sup>  
 TN<sup>K</sup>CVD<sup>P</sup>PC<sup>Y</sup>GAVTR<sup>C</sup>  
 ST<sup>K</sup>CV<sup>E</sup>PC<sup>C</sup>EEV<sup>S</sup>K<sup>C</sup>  
 T<sup>S</sup>RCVD<sup>P</sup>CC<sup>R</sup>EVTK<sup>C</sup>  
 TTR<sup>C</sup>VDP<sup>P</sup>CC<sup>G</sup>RVTK<sup>C</sup>  
 -ARY<sup>K</sup>NP<sup>CC</sup>GEV<sup>S</sup>K<sup>C</sup>  
 TT<sup>K</sup>CVD<sup>P</sup>CC<sup>G</sup>RVTK<sup>Y</sup>  
 ---VDP<sup>CC</sup>REVT<sup>SC</sup>  
 KTR<sup>C</sup>VDP<sup>P</sup>CC<sup>K</sup>EVTR<sup>C</sup>  
 TT<sup>T</sup>CVD<sup>P</sup>CC<sup>A</sup>EVTR<sup>C</sup>  
 AT<sup>K</sup>CID<sup>P</sup>CC<sup>Q</sup>DAT<sup>K</sup>C  
 TT<sup>T</sup>CVD<sup>P</sup>CC<sup>R</sup>EVTK<sup>C</sup>  
 TT<sup>T</sup>CVD<sup>P</sup>CC<sup>Q</sup>EVTK<sup>C</sup>  
 TT<sup>T</sup>CVD<sup>P</sup>CC<sup>K</sup>EVTK<sup>C</sup>  
 TT<sup>T</sup>CVD<sup>P</sup>CC<sup>Q</sup>EVTK<sup>C</sup>  
 TT<sup>T</sup>CVD<sup>P</sup>CC<sup>R</sup>EVAK<sup>C</sup>  
 TT<sup>T</sup>CVD<sup>P</sup>CC<sup>Q</sup>DAT<sup>Q</sup>C  
 TTR<sup>C</sup>AD<sup>P</sup>CC<sup>Q</sup>DVT<sup>Q</sup>C  
 T<sup>S</sup>T<sup>C</sup>VDP<sup>P</sup>CV<sup>P</sup>PC<sup>F</sup>V<sup>R</sup>P  
 T<sup>P</sup>LCAS<sup>I</sup>CG<sup>R</sup>HY  
 S<sup>I</sup>SCADI<sup>CC</sup>R<sup>K</sup>

**B****>Gga\_LOR1**

MGS<sup>H</sup>Q<sup>Q</sup>K<sup>G</sup>EG<sup>Q</sup>GI<sup>S</sup>EQ<sup>S</sup>GG<sup>C</sup>HGGGSSGGSS  
 CHGGGGGGG<sup>S</sup>CHSSGGGGG<sup>S</sup>  
 IGY<sup>Q</sup>S<sup>Q</sup>GG<sup>S</sup>CHGGGSSGGGG<sup>S</sup>  
 AIYQTHI<sup>SSSS</sup>FGGGGGGGGGG<sup>S</sup>  
 SG<sup>H</sup>Q<sup>Q</sup>EP<sup>I</sup>CI<sup>I</sup>GGGGGGSSGGGG<sup>S</sup>  
 SS<sup>H</sup>Q<sup>Q</sup>GP<sup>I</sup>CI<sup>I</sup>GGGGGGGGGG<sup>S</sup>  
 SD<sup>H</sup>Q<sup>Q</sup>GP<sup>I</sup>CI<sup>I</sup>GGGGGGGGGG<sup>S</sup>  
 SG<sup>H</sup>Q<sup>S</sup>K<sup>I</sup>PI<sup>CI</sup>SGGGGGK<sup>G</sup>EGG<sup>S</sup>  
 SS<sup>H</sup>Q<sup>Q</sup>GP<sup>I</sup>CI<sup>I</sup>GGGGGGGGGG<sup>S</sup>  
 SS<sup>H</sup>Q<sup>Q</sup>GP<sup>I</sup>CI<sup>I</sup>GGGGGGGGGG<sup>S</sup>  
 SS<sup>H</sup>Q<sup>Q</sup>GP<sup>I</sup>CI<sup>I</sup>GGGGGGGGGG<sup>S</sup>  
 SS<sup>H</sup>Q<sup>Q</sup>GP<sup>I</sup>CI<sup>I</sup>GGGGGGGGGG<sup>S</sup>  
 SG<sup>H</sup>Q<sup>S</sup>Q<sup>GP</sup>IC<sup>I</sup>GGGGGGGGGGG<sup>S</sup>  
 SG<sup>H</sup>Q<sup>Q</sup>GP<sup>I</sup>CI<sup>I</sup>GGGGGGGGGG<sup>S</sup>  
 SG<sup>H</sup>Q<sup>S</sup>Q<sup>GP</sup>IC<sup>I</sup>GGGSI<sup>I</sup>GGGGGGGG<sup>S</sup>  
 SS<sup>H</sup>Q<sup>Q</sup>GP<sup>I</sup>CI<sup>I</sup>SGGGGGGGGGGG<sup>S</sup>  
 SS<sup>H</sup>Q<sup>S</sup>Q<sup>GP</sup>IC<sup>I</sup>GGGGGGGGGGGG<sup>S</sup>  
 SG<sup>H</sup>Q<sup>S</sup>Q<sup>GP</sup>IC<sup>I</sup>GGGGGGGGGGGG<sup>S</sup>  
 SG<sup>Y</sup>Q<sup>Q</sup>GP<sup>I</sup>CI<sup>I</sup>GGGGGGGGGGGG<sup>S</sup>  
 SG<sup>H</sup>Q<sup>S</sup>Q<sup>GP</sup>IC<sup>I</sup>GGGGGGGGGGGG<sup>S</sup>  
 SG<sup>Y</sup>Q<sup>Q</sup>GP<sup>I</sup>CI<sup>I</sup>GGGGGGGGGG<sup>S</sup>  
 SS<sup>H</sup>Q<sup>S</sup>Q<sup>GP</sup>IC<sup>I</sup>GGGGGGGGGGGG<sup>S</sup>  
 SG<sup>Y</sup>Q<sup>S</sup>Q<sup>GP</sup>IC<sup>I</sup>GGGGGGGGGGGG<sup>S</sup>  
 SG<sup>H</sup>Q<sup>Q</sup>GS<sup>I</sup>CI<sup>I</sup>GGGSSGGGSSSG<sup>SGG</sup>  
 MS<sup>M</sup>Q<sup>Q</sup>QT<sup>Q</sup>PI<sup>S</sup>W<sup>P</sup>P<sup>Q</sup>T<sup>K</sup>H<sup>K</sup>

**C****>Aca\_EDSC**

MS<sup>Q</sup>Q<sup>V</sup>Q<sup>R</sup>G<sup>S</sup>SC<sup>CC</sup>SA  
 CC<sup>G</sup>SS<sup>R</sup>SS<sup>G</sup>  
 CC<sup>S</sup>SS<sup>R</sup>SS<sup>G</sup>  
 CC<sup>S</sup>G<sup>R</sup>SS<sup>G</sup>  
 CC<sup>G</sup>SS<sup>R</sup>SS<sup>G</sup>  
 CC<sup>G</sup>SS<sup>S</sup>SG<sup>K</sup>YV<sup>Q</sup>Q<sup>A</sup>Q<sup>A</sup>SA  
 GC<sup>G</sup>SS<sup>S</sup>SG<sup>G</sup>  
 CC<sup>G</sup>SS<sup>S</sup>SS<sup>G</sup>  
 CC<sup>S</sup>GG<sup>L</sup>S<sup>Q</sup>Q<sup>K</sup>Q<sup>V</sup>K<sup>M</sup>C<sup>P</sup>Q<sup>L</sup>K

**Suppl. Fig. S10. Examples of repetitive sequence elements in SEDC proteins of sauropsids.** The amino acid sequences of chicken EDDM (A), chicken lorricrin 1 (B) and anole lizard EDSC (C) were arranged to reveal sequence repeats. Abundant amino acid residues are color-coded as shown in Figure 3. Aca, *Anolis carolinensis*; Gga, *Gallus gallus*.

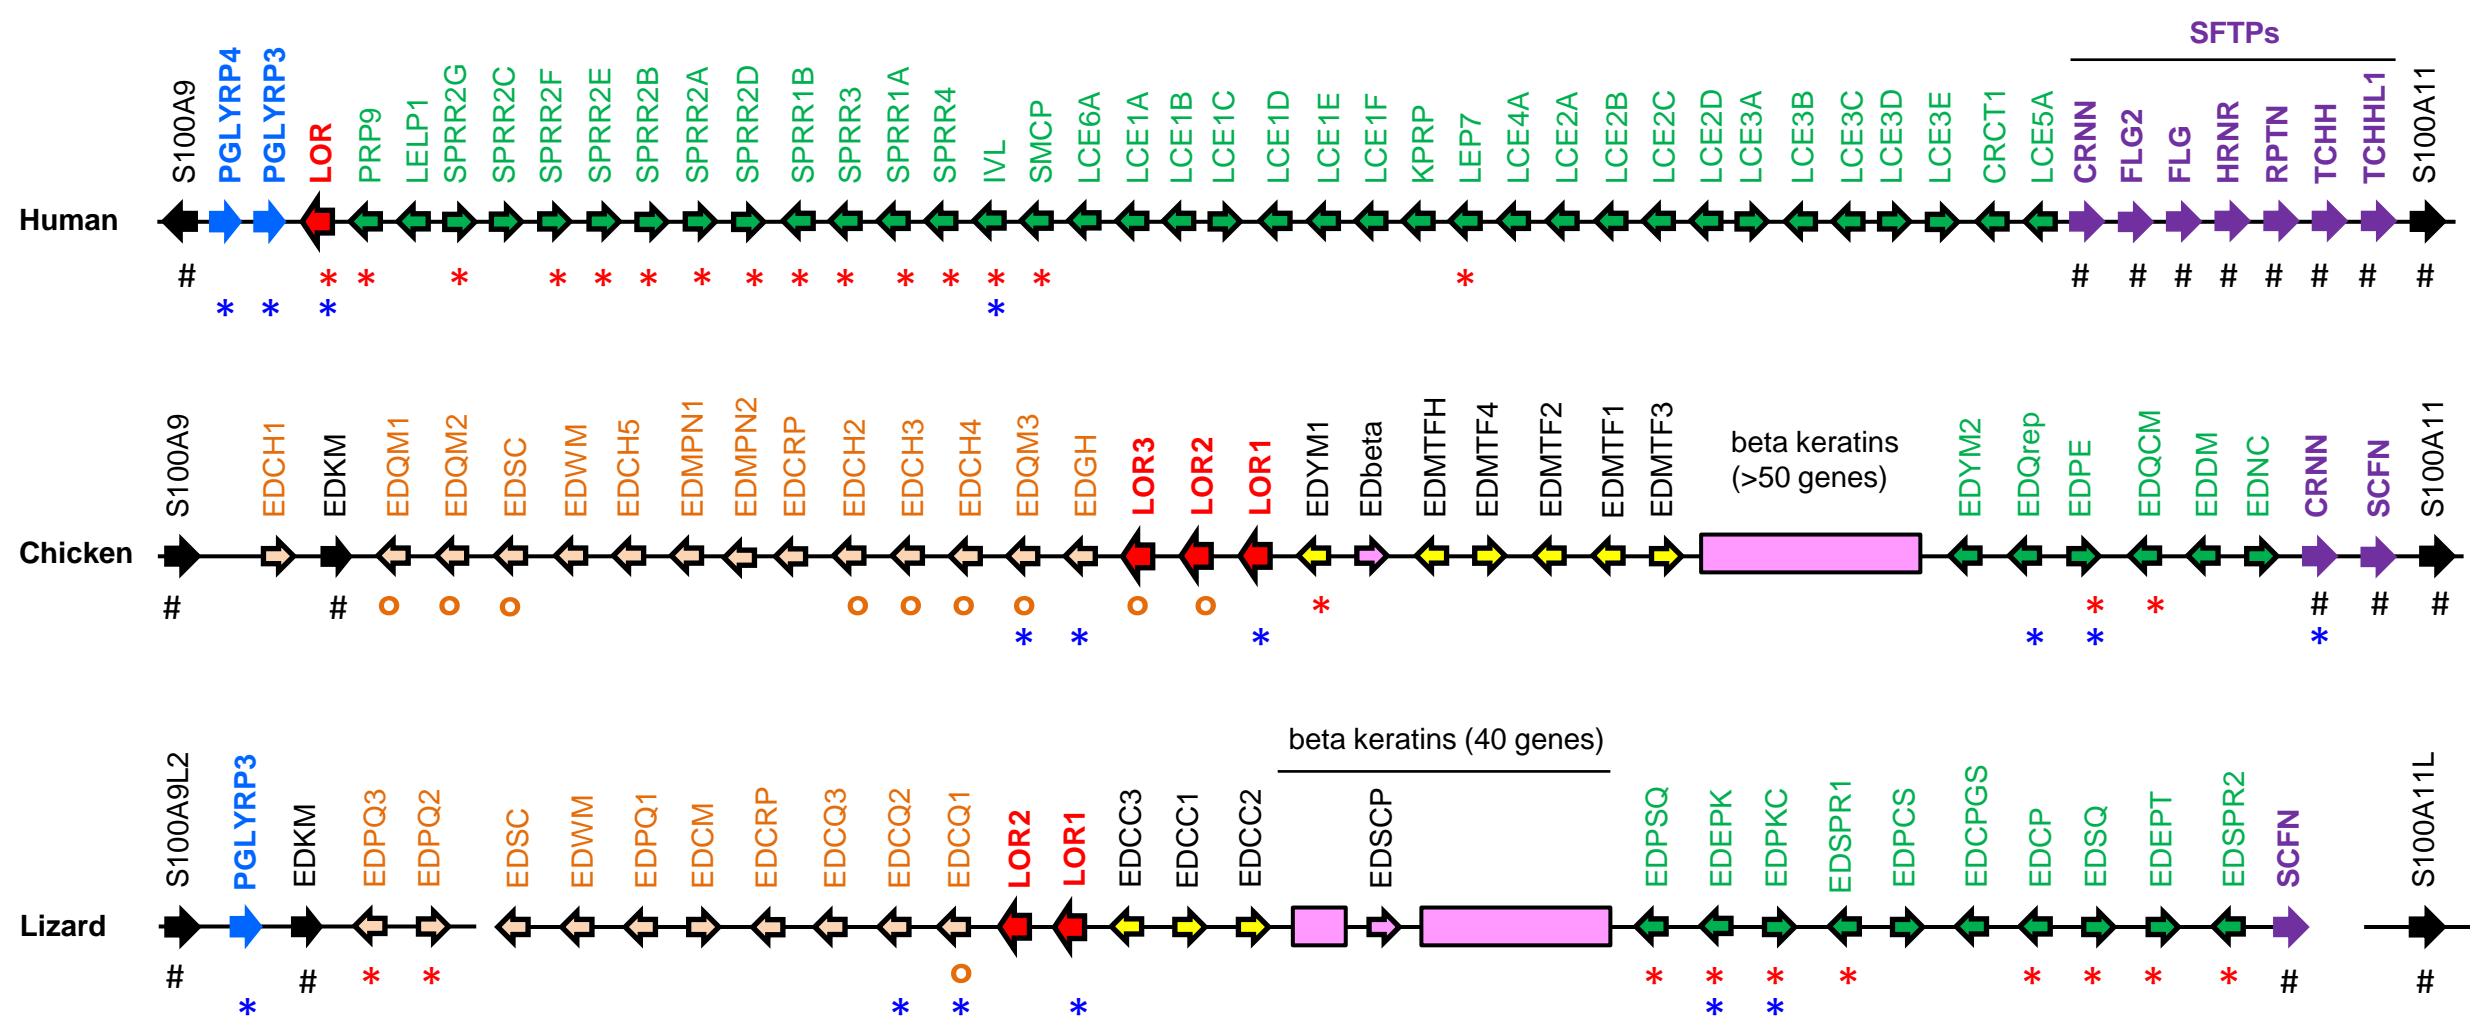

**Suppl. Fig. S11. Distribution of conserved sequence motifs among genes of the epidermal differentiation complex (EDC) in amniotes.** The hash keys mark genes encoding proteins with an S100 domain or S100 domain-like sequences (EDKM). Red and blue asterisks mark genes that encode proteins with the conserved N- and C-terminal sequence motifs, respectively (Fig. 4). Orange circles mark genes that encode proteins with the sauropsidian N-terminal sequence motif shown in Suppl. Fig. S12.

|           |       |   |   |   |   |   |   |   |    |    |   |   |   |
|-----------|-------|---|---|---|---|---|---|---|----|----|---|---|---|
| Gga       | EDCH2 | M | C | S | R | G | S | S | -- | C  | H |   |   |
| Gga       | EDCH3 | M | C | S | R | G | S | S | -- | C  | H |   |   |
| Gga       | EDCH4 | M | C | S | R | G | S | S | -- | C  | H |   |   |
| Gga       | LOR2  | M | C | S | R | Q | S | S | G  | G  | C | H |   |
| Gga       | LOR3  | M | C | S | R | Q | S | S | G  | G  | C | H |   |
| Gga       | EDSC  | M | C | S | R | Q | D | K | D  | Q  | C | H |   |
| Gga       | EDQM1 | M | C | S | R | Q | D | R | D  | Q  | C | H |   |
| Gga       | EDQM2 | M | C | S | R | Q | D | R | D  | Q  | C | H |   |
| Gga       | EDQM3 | M | C | S | R | A | D | R | D  | Q  | C | H |   |
| Aca       | EDCQ1 | M | C | S | R | G | D | R | D  | -- | C | H |   |
| Consensus |       | M | C | S | R | x | x | x | x  | x  | x | C | H |

**Suppl. Fig. S12. Identification of an amino acid sequence motif that is conserved at the N-terminus of a group of sauropsidian SEDC proteins.** Amino acid sequences of the N-terminus of SEDC proteins were aligned. Amino acid residues present at conserved positions are highlighted by colors. Aca, *Anolis carolinensis*; Gga, *Gallus gallus*.

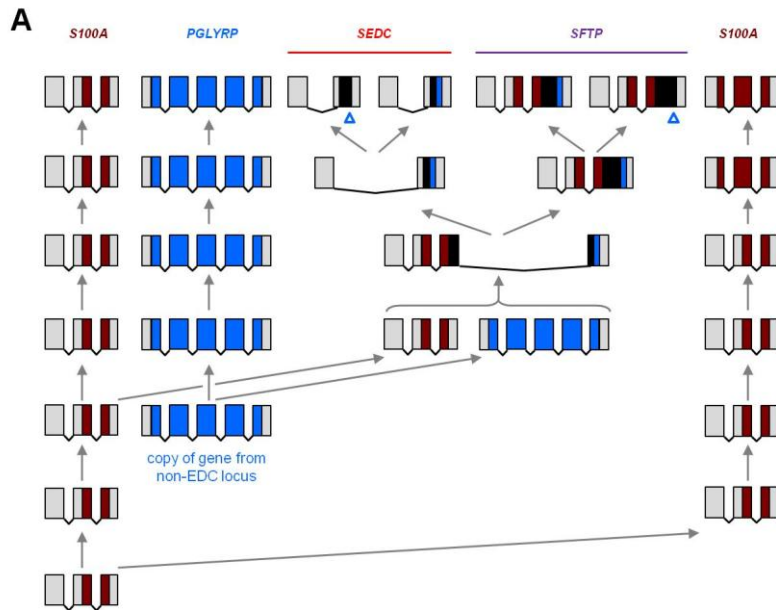

**Scenario 1:** The fusion of an S100A gene and a PGLYRP gene yielded a common ancestor of SEDC and SFTP genes that encoded a protein containing the C-terminal sequence motif. The PGLYRP-derived C-terminal motif was lost in subsets of SEDCs and SFTPs.

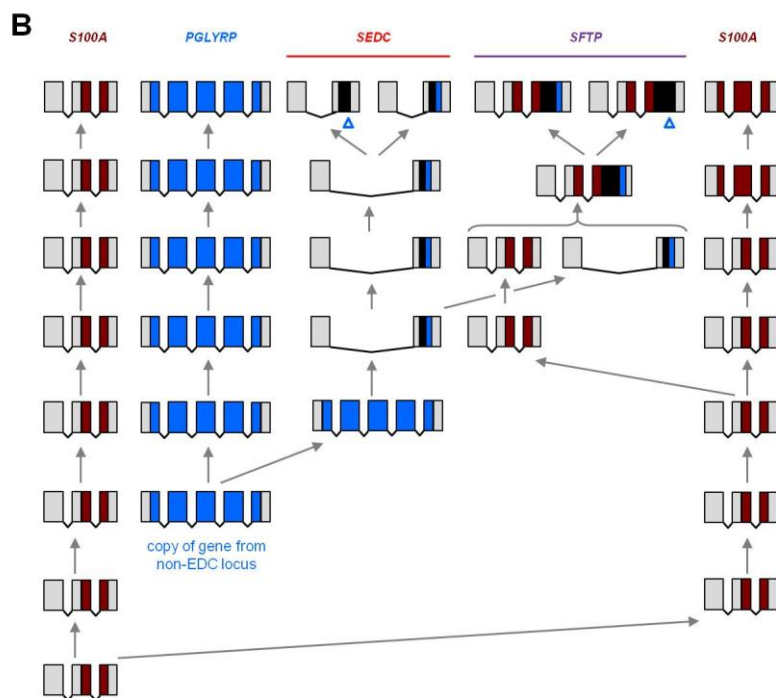

**Scenario 2:** The mutation of a PGLYRP gene (loss of exons and new start of coding sequence) yielded an SEDC gene. Fusion of this SEDC gene to an S100A gene yielded an SFTP gene. The PGLYRP-derived C-terminal motif was lost in subsets of SEDCs and SFTPs.

**Suppl. Fig. S13. Scenarios for the origin of SEDC and SFTP genes** (continued on the next page).

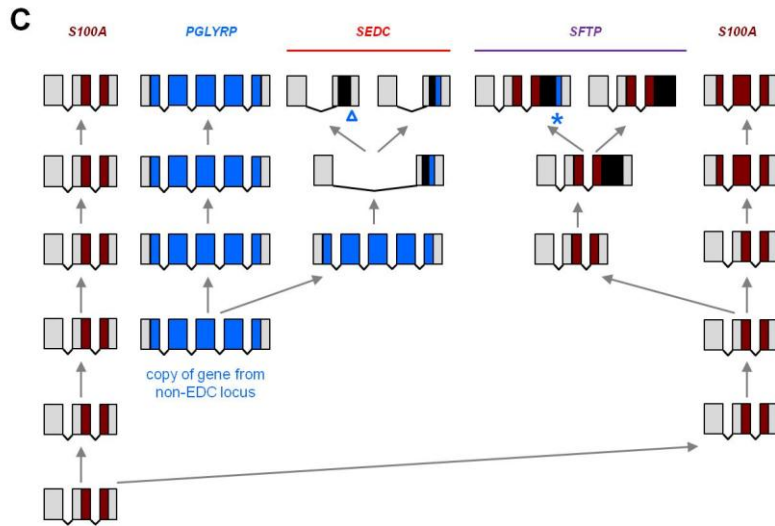

**Scenario 3:** The mutation of a PGLYRP gene yielded an SEDC gene. The extension of the coding sequence of an S100A gene yielded an SFTP. The C-terminal motif was lost in subsets of SEDCs and SFTPs. Independently, a similar C-terminal sequence motif originated in a subset of SFTPs.

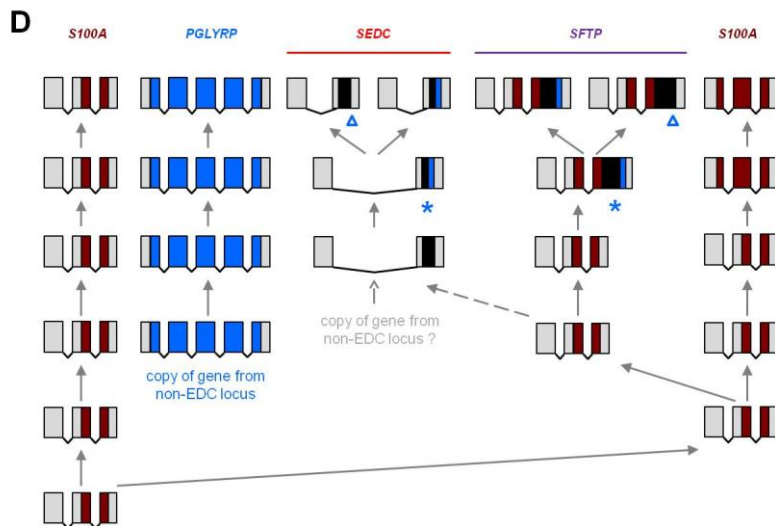

**Scenario 4:** The extension of an S100A coding sequence yielded an SFTP. The ancestral SEDC originated by mutation of an S100A gene or as a copy of a gene from another locus. The C-terminal sequence motif originated independently from PGLYRP in ancestral SEDC and ancestral SFTP. The C-terminal motif was lost in subsets of SEDCs and SFTPs.

**Suppl. Fig. S13 (continued). Scenarios for the origin of SEDC and SFTP genes.** Four alternative scenarios for the origin of SEDC and SFTP genes during the evolution of the EDC are schematically depicted. Exons are indicated by boxes, in which the non-coding regions are shaded grey and the coding regions are shaded in colors or in black. Identical colors indicate common ancestry and black indicates newly originated coding sequences. All genes shown are transcribed from left to right. Asterisks indicate an origin of the C-terminal sequence motif (Figure 4) independently from PGLYRP. Loss of the motif is indicated by the symbol  $\Delta$ . Note that the evolution of EDKM was not integrated into these schemes. In most S100A genes, exons 2 and 3 contain the entire coding sequence whereas in S100A11 (located next to SFTPs) the open reading frame starts in exon 1. In scenario 4 the insertion of the PGLYRP gene into the EDC locus may have occurred after the origin of the primordial SEDC and SFTP genes but prior to divergence of sauropsids and mammals.
